1  
2  
3  
4  
5  
6  
7  
8  
9  
10  
11  
12  
13  
14  
15  
16  
17  
18  
19  
20  
21  
22  
23

**FULL TITLE:**

**MHC GENETIC VARIATION INFLUENCES BOTH OLFACTORY SIGNALS AND SCENT  
DISCRIMINATION IN RING-TAILED LEMURS**

**RUNNING TITLE: MHC signaling & discrimination in Lemur catta**

**AUTHORS: KATHLEEN E. GROGAN<sup>1,2,3\*</sup>, RACHEL L. HARRIS<sup>2</sup>, MARYLÈNE BOULET<sup>4</sup>,  
CHRISTINE M. DREA<sup>1,2,5</sup>**

<sup>1</sup> University Program in Ecology, Duke University, Durham, NC, USA

<sup>2</sup> Department of Evolutionary Anthropology, Duke University, Durham, NC, USA

<sup>3</sup> Department of Psychology, Emory University, Atlanta, GA, USA

<sup>4</sup> Department of Biological Sciences, Bishop's University, Sherbrooke, Canada

<sup>5</sup> Department of Biology, Duke University, Durham, USA

\* Correspondence to: Kathleen E. Grogan, [kathleen.e.grogan@gmail.com](mailto:kathleen.e.grogan@gmail.com)

Mailing Address: 516 Carpenter Building

Pennsylvania State University

University Park, PA 16802

**Keywords:** MHC-DRB, genetic diversity, strepsirrhine primate, chemical signal, scent mark, sexual selection

24 **ABSTRACT (Limit 250 words)**

25           Diversity at the Major Histocompatibility Complex (MHC) is critical to health and fitness,  
26 such that MHC genotype may predict an individual's quality or compatibility as a competitor,  
27 ally, or mate. Moreover, because MHC products can influence the components of bodily  
28 secretions, an individual's body odor may signal its MHC and influence partner identification or  
29 mate choice. To investigate MHC-based signaling and recipient sensitivity, we test for odor-  
30 gene covariance and behavioral discrimination of MHC diversity and pairwise dissimilarity,  
31 under the good genes and good fit paradigms, in a strepsirrhine primate, the ring-tailed lemur  
32 (*Lemur catta*). First, we coupled genotyping with gas chromatography-mass spectrometry to  
33 investigate if diversity of the MHC-DRB gene is signaled by the chemical diversity of lemur  
34 genital scent gland secretions. We also assessed if the chemical similarity between individuals  
35 correlated with their MHC similarity. Next, we assessed if lemurs discriminated this chemically  
36 encoded, genetic information in opposite-sex conspecifics. We found that both sexes signaled  
37 overall MHC diversity and pairwise MHC similarity via genital secretions, but in a sex- and  
38 season-dependent manner. Additionally, both sexes discriminated absolute and relative MHC-  
39 DRB diversity in the genital odors of opposite-sex conspecifics, supporting previous findings that  
40 lemur genital odors function as advertisement of genetic quality. In this species, genital odors  
41 provide honest information about an individual's absolute and relative MHC quality.  
42 Complementing evidence in humans and Old World monkeys, our results suggest that reliance  
43 on scent signals to communicate MHC quality may be important across the primate lineage.

## 44 INTRODUCTION

45 The Major Histocompatibility Complex (MHC) is an extremely polymorphic group of genes  
46 within the adaptive immune system of vertebrates that plays a critical role in disease resistance  
47 (Piertney & Oliver 2006). Because genetic diversity at the MHC is fundamentally linked to  
48 parasite resistance, survivorship, and reproductive success (Sommer 2005a, Piertney & Oliver  
49 2006), an individual's MHC genotype is hypothesized to be an important predictor of its quality  
50 as a mate. If recognizable to others, animals could increase their reproductive success by  
51 selecting mates that possess particular MHC genotypes, such as diverse alleles or specific  
52 disease-resistant alleles (Penn & Potts 1999, Mays & Hill 2004). Although researchers have  
53 found evidence that MHC genotype influences mate choice or its proxies in many species  
54 (reviewed in Kamiya et al. 2014), the mechanism by which animals assess the MHC of  
55 conspecifics is still under investigation (reviewed in Ruff et al. 2012). Given that the protein  
56 products of the MHC can influence body odor, scientists have implicated an olfactory-based  
57 mechanism (reviewed in Ziegler et al. 2005, Boehm & Zufall 2006); however, researchers rarely  
58 combine chemical and behavioral approaches within the same study to test the purported  
59 mechanism of information transfer (Leinders-Zufall et al. 2004, Milinski et al. 2005). Here, using  
60 the ring-tailed lemur (*Lemur catta*) – a strepsirrhine primate for which there is strong evidence of  
61 condition-dependent olfactory signaling (Charpentier et al. 2008, Boulet et al. 2010, Crawford et  
62 al. 2011) – we test for olfactory-based MHC advertisement and recognition. Specifically, we  
63 combine MHC genotyping with chemical analyses of genital secretions and with behavioral tests  
64 of scent discrimination between opposite-sex conspecifics to ask 1) if lemurs advertise their  
65 genetic quality and similarity at the MHC via chemical cues and 2) if conspecifics can detect this  
66 olfactory information.

67 Because an offspring's health is influenced by the genotypes inherited from its parents,  
68 extreme polymorphism of the MHC is likely to be maintained both by health-mediated natural  
69 selection and by MHC-based sexual selection (Winternitz et al. 2013). Potential mates might be

70 chosen for their MHC diversity, for their possession of a particular disease-resistant allele or for  
71 their MHC dissimilarity relative to the chooser (Sommer 2005a, Milinski 2014). Two models  
72 have been developed to explain the types of genetic benefits accrued owing to the potential  
73 partner's genotype: In the 'good genes' model, individuals, regardless of their own genotype,  
74 choose 'high-quality' mates, with quality being defined by absolute or optimal genetic diversity or  
75 by possession of a particularly beneficial allele (Andersson 1994, Penn 2002, Neff & Pitcher  
76 2005, Kempenaers 2007). This model is supported by research in several species of fish  
77 (Forsberg et al. 2007, Eizaguirre et al. 2009, Evans et al. 2012), and birds (Ekblom et al. 2004,  
78 Richardson et al. 2005).

79 In the 'good fit' model, individuals choose mates based on their relative genetic  
80 compatibility (Trivers 1972, Brown 1999, Neff & Pitcher 2005), so as to optimize parental  
81 genetic dissimilarity, minimize the risk of inbreeding or increase the genetic diversity of their  
82 offspring (Tregenza & Wedell 2000, Penn 2002). Support for this model (reviewed in Kamiya et  
83 al. 2014) derives from species of fish (Landry et al. 2001, Aeschlimann et al. 2003, Neff et al.  
84 2008), reptiles (Olsson et al. 2003), birds (Bonneaud et al. 2006, Freeman-Gallant et al. 2003),  
85 and mammals (Radwan et al. 2008, Burger et al. 2015), including primates (Ober 1999,  
86 Schwensow et al. 2007 & 2008, Setchell et al. 2010, Kromer et al. 2016). The good genes and  
87 good fit models are not mutually exclusive, however, because a potential mate could be both  
88 maximally diverse and optimally dissimilar (Mays & Hill 2004). Individuals may also alter their  
89 preferences based on environmental conditions, current pathogen pressures or potential risk of  
90 inbreeding (Qvarnstrom 2001, Mays & Hill 2004).

91 Regardless of the model, for mate choice to be influenced by the MHC, individuals must  
92 both signal their respective MHC genotype and be able to evaluate the MHC information in the  
93 signals of conspecifics (Boehm & Zufall 2006, Hettyey et al. 2010). Previously, researchers  
94 have shown that condition-dependent signals of quality can be used by both sexes to assess  
95 potential mates (Penn & Potts 1998a & 1998b, Charpentier et al. 2010, Johansson & Jones

96 2007). Although evidence of correlation with MHC genotype has derived primarily from visual  
97 signals, such as antler size (Ditchkoff et al. 2001) or bright coloration (Setchell et al. 2009),  
98 chemical signals could prove more reliable for advertising MHC genotype (Blaustein 1981, Penn  
99 2002, Mays & Hill 2004, Ziegler et al. 2005): Notably, because degraded MHC molecules are  
100 shed from the cell surface and found in body fluids (e.g., serum, saliva, sweat, urine, and  
101 glandular secretions), they may function directly as odorants (Singh et al. 1987, Milinski et al.  
102 2005, Boehm & Zufall 2006). MHC molecules may also bind relevant volatile compounds  
103 (Leinders-Zufall et al. 2004, Willse et al. 2005, Aksenov et al. 2012, but see Kwak et al. 2010).  
104 Lastly, the MHC may influence the composition of the host's microbiota (Lanyon et al. 2007,  
105 Zomer et al. 2009, Archie & Theis 2011), including those dwelling within scent glands that  
106 contribute to volatile chemical production (Gorman et al. 1974, Theis et al. 2013, Leclaire et al.  
107 2017a & 2017b). Among taxa that display MHC-associated mate choice, researchers have  
108 implicated the operation of an olfactory mechanism in fish (Reusch et al. 2001, Aeschlimann et  
109 al. 2003, Milinski et al. 2005), reptiles (Olsson et al. 2004), birds (Ekblom et al. 2004, Leclaire et  
110 al. 2014), and mammals (Yamazaki et al. 1976, Radwan et al. 2008), including humans  
111 (reviewed in Havlicek & Roberts 2009, Winternitz et al. 2016).

112 In terms of a model species for an odor-based test of MHC signaling (e.g., Knapp et al.  
113 2006) and discrimination of mate quality, ring-tailed lemurs are ideal because of their elaborate  
114 system of olfactory communication (Jolly 1966). Animals of both sexes engage in genital scent  
115 marking, depositing chemically complex secretions that share ~170 volatile compounds  
116 (Scordato et al. 2007). The diversity and relative abundance of these chemicals contain  
117 information about the signaler's sex, breeding condition, individual identity, and genome-wide  
118 microsatellite diversity (or neutral heterozygosity), as well as its relatedness to other individuals  
119 (Scordato et al. 2007, Charpentier et al. 2008, Boulet et al. 2009 & 2010, Crawford et al. 2011).  
120 Moreover, this chemically encoded information is salient and distinguishable to conspecifics  
121 (Scordato & Drea 2007, Charpentier et al. 2010, Crawford et al. 2011). Thus, lemur genital

122 odors honestly advertise at least one measure of genetic quality and relatedness in both sexes.  
123 To test if ring-tailed lemurs also advertise their MHC quality and dissimilarity via olfactory  
124 signals, we genotyped animals at the most diverse MHC gene, DRB, analyzed the volatile  
125 chemical composition of their genital secretions, and used behavioral testing to determine if  
126 conspecifics can use genital scent to discriminate between MHC genotypes, according to either  
127 the good genes or good fit models.

128

## 129 **METHODS**

130

### 131 *Subjects*

132 Our subjects ( $N = 62$ ) derived from three captive populations of ring-tailed lemurs, located  
133 at the Duke Lemur Center (DLC,  $N = 24$  females and 24 males) in Durham, NC, the Indianapolis  
134 Zoo ( $N = 8$  females and 4 males) in Indianapolis, IN, and the Cincinnati Zoo ( $N = 2$  females) in  
135 Cincinnati, OH. All of the animals were healthy adults that were reproductively intact (i.e.,  
136 neither gonadectomized nor hormonally contracepted) at the time of study. They were housed in  
137 mixed-sex pairs or groups, with similar living conditions and provisioning routines across all  
138 three institutions (for more details, see Scordato et al. 2007). Animal care met with institutional  
139 guidelines and was in accordance with regulations of the United States Department of  
140 Agriculture. The research protocols were approved by the Institutional Animal Care and Use  
141 Committee of Duke University (protocol numbers A245-03-07 & A143-12-05) and by the  
142 research directors of each zoo.

143 As described below, although all individuals were genotyped for MHC-DRB diversity, not  
144 all individuals participated as secretion donors for chemical analyses or bioassay presentation,  
145 nor did all individuals participate as bioassay recipients. To achieve appropriate sample sizes  
146 while working with an endangered species often requires years of sample collection and  
147 observation, which presents various logistical challenges (for more details, see Drea et al.

148 2013). Specific to our work here, secretion sampling is restricted because of several factors,  
149 including but not limited to facility practices which limit captures in order to avoid undue stress  
150 for the animals, and unavailability of an animal due to hormonal contraception (Crawford et al.  
151 2011), pregnancy (Crawford & Drea 2015), mortality, or transfer between facilities. Participation  
152 as a bioassay recipient may also be precluded because of participation in previous studies  
153 leading to a lack of any 'unknown' donor odors to present. For this study, however, we have  
154 overcome these challenges wherever possible through long-term study or the addition of  
155 animals from other facilities for use as participants.

156

### 157 *MHC genotyping*

158 Using DNA extracted from whole blood or tissue, we genotyped the subjects at the MHC-  
159 DRB loci using parallel tagged next-generation sequencing (Grogan et al. 2016). Briefly, we  
160 amplified a 171-bp fragment, excluding primers, of the 270-bp second exon of the MHC-DRB  
161 gene. This fragment is the most frequently genotyped MHC loci in non-model primate species,  
162 especially in lemur species for which genomic data to design primers are scarce (e.g.,  
163 Schwensow et al. 2007, Huchard et al. 2012, Sommer et al. 2013, Pechouskova et al. 2015,  
164 Kaesler et al. 2017). Because this fragment excludes several variable amino acids within the  
165 MHC-DRB gene, we are likely underestimating the amount of MHC-DRB variability present.  
166 Nonetheless, because the genotyped fragment represents the most variable part of exon 2, we  
167 can use this 171-bp fragment as a proxy of diversity across the 6 exons of MHC-DRB. We  
168 sequenced pooled amplicons using parallel tagged sequencings on two platforms: Ion Torrent  
169 PGM® 314v2 chips (Life Technologies, Grand Island, NY, USA) and 454 Titanium® 1/8th lanes  
170 (Roche, Nutley, NJ, USA). True MHC-DRB alleles were distinguished from artefacts using a  
171 published workflow (Grogan et al. 2016). Each ring-tailed lemur possessed a mean  $\pm$  S.D. of  
172  $2.22 \pm 0.92$  MHC-DRB alleles (range = 1-4; see Supplemental Table 1, adapted from Grogan et  
173 al. 2017). Next, because of the degeneracy of the genetic code and the similarity in the

174 physiochemical properties of some amino acids, we organized these MHC-DRB alleles ( $N = 20$ )  
175 into MHC-DRB ‘supertypes’ ( $N = 13$ ; Grogan et al. 2017). Supertypes are groups of MHC alleles  
176 that have similar antigen binding properties despite having different nucleotide sequences  
177 (Doytchinova & Flower 2005, Schwensow et al. 2007), and thus are likely to bind the same  
178 subset of pathogen peptides. Supertypes are determined first by aligning the MHC-DRB  
179 sequences with the human HLA-DRB sequence (Brown et al. 1993) to identify antigen binding  
180 sites. Then, amino acid sites under positive selection are identified using the CODEML analysis  
181 in PAML (Version 4.7; Yang 2007). For amino acids identified as under putative positive  
182 selection, we imported their physiochemical properties, including hydrophobicity, steric bulk,  
183 polarity, and electronic effects (Sandberg et al. 1998), into a matrix in Genesis 1.7.6 (Sturn et al.  
184 2002). Finally, using hierarchical clustering via Euclidean distance methods, we identified  
185 supertypes based on antigen binding similarity. The range of the number of alleles collapsed  
186 into each supertype grouping is 1-8 alleles, with a mean  $\pm$  S.D. of  $2.01 \pm 1.54$  alleles.

187

### 188 *Genital secretion sample collection*

189 We collected secretion samples from the genital glands of ‘donor’ animals from two  
190 captive ‘populations’: the DLC over 10 years (2003-2013,  $N = 24$  females, 24 males) during the  
191 breeding and nonbreeding seasons, and the Indianapolis Zoo (2011,  $N = 8$  females, 1 male)  
192 during the breeding season. For ring-tailed lemurs in the Northern Hemisphere, we considered  
193 samples collected from November to March to be ‘breeding season’ samples and those  
194 collected from May to August to be ‘nonbreeding season’ samples (Drea 2007, Scordato et al.  
195 2007). At the DLC, trained handlers carefully caught and gently restrained the animals, which  
196 were awake and habituated to these procedures. At the Indianapolis Zoo, collections occurred  
197 during annual physical examinations, performed by Zoo staff members, while the animals were  
198 under anesthesia. No secretions were collected from subjects at the Cincinnati Zoo. Following  
199 published methods (Scordato et al. 2007), we used pre-cleaned cotton swabs and forceps to



200 collect the secretions. We placed the scented swabs in pre-cleaned chromatography vials and  
201 stored the vials at -80 °C until their use in chemical analysis or behavioral experiments. We  
202 have previously shown that individual-specific scent signatures are stable across both years and  
203 storage time (Scordato et al. 2007, Crawford et al. 2011, Drea et al. 2013). These odors were  
204 used for either chemical analyses or bioassay presentation, based upon the season of  
205 collection, the number of odors available per individual, and the number of possible recipients to  
206 which the odor could be presented. In order to maximize the possible bioassay presentations,  
207 we prioritized achieving an appropriate sample size for chemical analyses to detect statistical  
208 differences rather than analyzing the chemistry of every individual.

209

#### 210 *Gas chromatography-mass spectrometry*

211 All chemical analyses were performed on secretions collected from subjects at the DLC.  
212 We used previously published methods to quantify the volatile chemical composition of a subset  
213 of these genital secretions (collected from  $N = 20$  females, 23 males). These data include  
214 previously published data from some individuals ( $N = 17$  females, 19 males; Scordato et al.  
215 2007, Charpentier et al. 2008, Boulet et al. 2010), as well as unpublished data from additional  
216 individuals ( $N = 3$  females, 5 males). Briefly, we extracted the volatile components of the  
217 secretions into 1.5 ml of methyl-*tert*-butyl ether, concentrated the extraction, and analyzed the  
218 components on a Shimadzu GCMS-QP2010 instrument (Shimadzu Scientific Instruments)  
219 equipped with a Shimadzu AOC-20 series autosampler. The compounds were detected using  
220 the automatic peak detector (SOLUTION WORKSTATION software, Shimadzu Scientific  
221 Instruments) and the peaks individually verified via consultation with the National Institute of  
222 Standards and Technology library (for further details, see Drea et al. 2013).

223 For analyses of the chemical data, we discarded compounds with inconsistent retention  
224 times or that did not comprise at least 0.05% of the overall area of the GC-MS chromatogram.  
225 The remaining compounds ( $N = 338$  compounds from female genital secretions and 203

226 compounds from male genital secretions) consisted of fatty acids, fatty acid esters, cholesterol  
227 derivatives, alkanes, and other unidentified compounds (Scordato et al. 2007, Charpentier et al.  
228 2008, Boulet et al. 2010). To represent the overall chemical composition of lemur genital  
229 secretions (Charpentier et al. 2008), we used three measures of diversity: richness, the  
230 Shannon index, and the Simpson index (Legendre & Legendre 1998, McCune et al. 2002). For  
231 our purposes, richness is the absolute number of compounds present per chromatogram  
232 regardless of relative abundance or rarity. By contrast, the Shannon and Simpson diversity  
233 indices reflect the relative abundances in different ways: The Shannon index is primarily  
234 influenced by common compounds of intermediate abundance, whereas the Simpson index  
235 gives more weight to compounds of the greatest relative abundance (McCune et al. 2002,  
236 Charpentier et al. 2008). We calculated these diversity indices for each individual's overall  
237 chemical profile, as well for specific subsets of compounds that have been implicated in  
238 signaling fertility: fatty acids ( $N = 33/338$  and  $25/203$  in female and male genital secretions,  
239 respectively) and fatty acid esters ( $N = 112/338$  and  $87/203$ ; Boulet et al. 2010, Crawford et al.  
240 2011).

241

#### 242 *Behavioral bioassays*

243 To test if ring-tailed lemur 'recipients' can use the secretions of 'donors' to discriminate  
244 between the MHC genotypes of opposite-sex conspecifics, we conducted 300 behavioral trials or  
245 'bioassays,' (Scordato et al. 2007, Charpentier et al. 2008, Greene et al. 2016). To maximize our  
246 use of 'unknown' donors per recipient (i.e., the recipient had never resided in a group with the  
247 donor nor had smelled secretions from the donor during a previous bioassay experiment), we  
248 used recipients ( $N = 27$ ) from the multiple institutions, including at the DLC ( $N = 5$  females and 14  
249 males), Cincinnati Zoo ( $N = 2$  females), and Indianapolis Zoo ( $N = 2$  females and 4 males), and  
250 secretion samples from 'unknown' donors of the opposite sex at the DLC ( $N = 31$  females and 18  
251 males). Bioassays were conducted from November-February in 2011 and 2012 following

252 previously established protocols (see Scordato et al. 2007, Charpentier et al. 2008, Greene et al.  
253 2016). First, we temporarily isolated a recipient from its group members, then secured three fresh  
254 wooden dowels in a row to the fence of the animal's enclosure (separated by 20 cm) at a 45° angle  
255 to the ground. The center dowel served as an unscented control, whereas a ~2 cm area of the  
256 outer dowels (at lemur nose level) were rubbed for ~10-15 seconds with the scented swabs from  
257 different donors, to simulate a naturally placed scent mark. Each recipient underwent 1-3 trials per  
258 day over 4-6 days, with each trial lasting 10 minutes, ultimately participating in 8-12 trials in total.  
259 We presented the secretions to each recipient in randomized order. We also maximized the  
260 number of donor dyads whose secretions could be presented across recipients, while minimizing  
261 the number of times we presented a given donor's secretions to any recipient (average  $\pm$  S.D.  
262 exposures =  $1.85 \pm 1.05$ , range = 0-6). Upon completion of the day's trials, the recipient was  
263 reunited with its group.

264 The bioassays were videotaped and the videos were scored by three observers, using an  
265 established ethogram. Prior to scoring experimental trials, we calculated inter-observer reliability  
266 from five 'practice' trials. Differences in the labeling of an event or in the chronology or timing  
267 (>1 s) were considered disagreements (Martin & Bateson 2007, Scordato et al. 2007) and  
268 scoring of videos did not commence until inter-observer reliability scores exceeded 90%. The  
269 behavior recorded included the recipient's proximity to each dowel and its sniffing, licking, biting,  
270 genital marking and, for males only, shoulder rubbing, wrist marking, and tail rubbing  
271 (Supplemental Table 2, adapted from Scordato et al. 2007). We also recorded where  
272 investigatory or scent-marking behavior occurred relative to each scent 'mark' (i.e., whether the  
273 behavior was directed at the mark itself, adjacent to the mark, but on the dowel, or within 15 cm  
274 of the dowel). Specifically, we recorded the location of countermarks because their placement  
275 could have particular significance: Overmarking or placing one's mark directly on top of the original  
276 mark might mask the original mark, whereas adjacent-marking or placing one's mark near the  
277 original mark leaves the original mark intact (Drea 2014).

278

279 *Statistical Analyses*

280

281 *General analytical procedures*

282 To examine the relationships between MHC-DRB genotype and olfactory ornamentation,  
283 as well as the ability of ring-tailed lemurs to discriminate MHC genotype via genital secretion,  
284 we analyzed the data in a series of generalized linear mixed models (GLMMs), using the  
285 package 'glmmADMB' (Version 0.7.7) in RStudio (Version 3.0.2; RStudio 2015). MHC diversity  
286 can be measured in several ways (e.g. the number of alleles in an individual's genotype, the  
287 number of supertypes, or the number of amino acid differences between all alleles in an  
288 individual's genotype, described below), as can MHC similarity between individuals. We  
289 assessed several measures of MHC diversity for an individual, as well as several measures of  
290 similarity between dyads. Because we expected all measures of MHC genetic diversity to be  
291 correlated, we evaluated each of the explanatory genetic variables independently, and used  
292 Akaike information criteria (AIC) values to determine the best model (Zuur et al. 2009). We  
293 considered the model with the lowest AIC value to be the best fit for the data and report only  
294 those models. To examine if MHC similarity were reflected in chemical similarity, we used partial  
295 Mantel tests to compare the number of un-shared or unique MHC-DRB supertypes to the  
296 relative Euclidean distance matrices between male-male (MM), female-female (FF), and male-  
297 female (MF) dyads.

298

299 *Analyses of MHC-DRB diversity and chemical complexity in individual males and females*

300 To examine the relationship between MHC-DRB diversity and chemical complexity, we  
301 analyzed the sexes separately and each chemical diversity index was evaluated in a separate  
302 series of GLMMs using either a Gaussian or gamma distribution (see Supplemental Table 3).  
303 We included donor identity as a random variable. Explanatory variables included season (i.e.,

304 breeding and nonbreeding) and one of four different genetic variables. Our four measures of  
305 MHC-DRB diversity were 1) the absolute number of MHC-DRB alleles ( $MHC_{allele}$ ), 2) the number  
306 of MHC-DRB supertypes ( $MHC_{supertype}$ ), 3) the average nucleotide base-pair differences between  
307 all alleles within an individual donor ( $MHC_{seqmean}$ ), and 4) the mean number of amino acid  
308 differences between the alleles possessed by an individual donor ( $MHC_{aamean}$ ; Supplemental  
309 Table 3). Because of the skew in frequency of specific MHC-DRB supertypes, i.e., seven  
310 supertypes were found in fewer than five individuals whereas one supertype was found in more  
311 than 85% of individuals, we were unable to examine if the possession of a specific supertype  
312 can be signaled via the chemical complexity of genital secretions. For females, we also  
313 analyzed the diversity of two subsets of chemicals, fatty acids (FAs) that are known to signal  
314 fertility in female primates (Michael et al. 1974, Doty et al. 1975, Matsumoto-Oda et al. 2003),  
315 and fatty acid esters (FAEs), which are synthesized from FAs (Cheng & Russell 2004, Hargrove  
316 et al. 2004). We have shown that both chemical subsets are correlated with microsatellite  
317 diversity of female ring-tailed lemurs during the breeding season (Boulet et al. 2010). We were  
318 unable to control for neutral heterozygosity estimated via microsatellites (see Charpentier et al.  
319 2008, Boulet et al. 2010 for microsatellite methods), because microsatellite data were  
320 unavailable for > 20% of our subjects. Nevertheless, we did assess the correlation between  
321 microsatellite heterozygosity and MHC diversity, i.e., the number of MHC-DRB alleles and  
322 MHC-DRB supertypes. Using the subset of subjects for which both genetic measures of  
323 diversity were available ( $N = 36$ ), we found no correlation between microsatellite heterozygosity  
324 and the number of MHC-DRB alleles within an individual (correlation coefficient = 1.056,  $F =$   
325 1.51,  $P = 0.227$ ), and no correlation between microsatellite heterozygosity and the number of  
326 MHC-DRB supertypes (correlation coefficient = -0.8812,  $F = 1.461$ ,  $P = 0.235$ ; however, see  
327 Grogan et al. 2017). As we had previously found no correlation between individual chemical  
328 diversity and adult age, month of collection within season, or DLC housing condition  
329 (Charpentier et al. 2008), we did not include these co-variables in our analyses. Lastly, to

330 ensure that the few individuals with the most diverse MHC-DRB genotype were not driving any  
331 association between MHC-DRB diversity and chemical diversity, we re-ran the final GLMMs  
332 after removing the most diverse individuals from both the male ( $N = 1$ ) and female analyses ( $N$   
333 = 1).

334

### 335 *Analysis of MHC relatedness and chemical similarity between all possible dyads*

336 To investigate if chemical similarity between dyads reflects similarity in their MHC  
337 genotypes, we calculated matrices of genetic distances using the number of different MHC  
338 supertypes between each dyad, or the number of different putative antigen binding pocket  
339 configurations that are present in one individual but not the other. We then estimated chemical  
340 distances between pairs of individuals by analyzing all chemicals present in secretion profiles of  
341 males ( $N = 203$  compounds; Charpentier et al. 2008), females ( $N = 338$ ; Boulet et al. 2010), or  
342 in both sexes ( $N = 170$ ; Boulet et al 2009). We calculated relative Euclidean distance matrices  
343 for same-sex (MM or FF) and mixed-sex (MF) dyads, respectively, using PC-ORD (version 7.0,  
344 McCune & Mefford 2016), and following published protocols (Charpentier et al. 2008, Boulet et  
345 al. 2009). We calculated matrices separately as follows: breeding season (22 males,  $N = 231$   
346 MM dyads; 17 females,  $N = 136$  FF dyads; 39 males and females,  $N = 374$  MF dyads);  
347 nonbreeding season (20 males,  $N = 190$  MM dyads; 18 females,  $N = 153$  FF dyads; 38 males  
348 and females,  $N = 360$  MF dyads). Because MM and FF matrices were square, we assessed  
349 linear relationships between chemical and MHC distances using partial Mantel tests in FSTAT  
350 (version 2.9.3.2, with 10,000 randomizations; Goudet 2001). As in previous studies (Charpentier  
351 et al. 2008, Boulet et al. 2010), we controlled for potentially confounding covariates, including  
352 the subject's age, social housing condition, and the month of secretion sample collection. For  
353 the MF comparisons, we first generated full matrices using all possible MM, FF, and MF pairs  
354 (breeding season  $N = 704$  dyads, nonbreeding season  $N = 741$  dyads). We then extracted  
355 chemical, genetic, and covariate information for MF dyads only. Unlike MM and FF matrices, the

356 MF matrix was not square. Therefore, we assessed relationships with 10,000 Spearman's  
357 correlation permutation tests using the JMUOUTLIER package in R (Version 1.3; Garren 2016),  
358 as in the study by Slade et al. (2016). Lastly, we assessed the correlation between MHC  
359 similarity within dyads (i.e., the number of unique or unshared MHC-DRB alleles and supertypes  
360 between two individuals) with dyad relatedness, as measured by the Queller and Goodnight  
361 index (IDQG calculated by Boulet et al. 2010). We found that although dyad relatedness was  
362 significantly correlated with MHC dissimilarity for both number of MHC-DRB alleles ( $N = 629$   
363 dyads, slope = -0.71, T-value = -4.21,  $P = 0.000029$ ) and number of MHC-DRB supertypes ( $N =$   
364 629 dyads, slope = -0.67, T-value = -4.23,  $P = 0.000027$ ), the negative relationships explained  
365 less than 3% of the variance in either correlation ( $R^2 = 0.026$  and  $R^2 = 0.026$ , respectively).

366

#### 367 *Behavioral analyses of mixed-sex, recipient-donor combinations*

368 We explored the relationship between the recipients' behavioral responses to donor  
369 secretions and measures of absolute and relative MHC-DRB diversity between the mixed-sex,  
370 recipient-donor dyads (Table 1). To test for patterns that would be consistent with disassortative  
371 mating under the good fit model, we used several measures of dissimilarity and sequence  
372 divergence between each recipient-donor dyad (Schwensow et al. 2008, Setchell et al. 2010,  
373 Huchard et al. 2013). We also used the donor's number of MHC alleles ( $MHC_{donor}$ ) to examine if,  
374 under the good genes model, the secretion of potential 'mates' with the greatest MHC diversity  
375 were distinguished, regardless of their dissimilarity. Lastly, we also examined non-linear  
376 relationships between MHC diversity and dissimilarity between dyads by including the quadratic  
377 forms of all genetic explanatory variables in our GLMMs. Quadratic terms were retained only if  
378 the AIC value was better than the GLMM that included only linear terms.

379 In our analyses, we excluded all recipient behavior that occurred in < 5% of trials and any  
380 behavior that did not show a significant differential response via Wilcoxon signed-rank tests in  
381 favor of the test dowels over the blank, control dowel (Supplemental Table 4; Charpentier et al.



2010). Ultimately, for male recipients, we analyzed proximity to the pole, sniffing and licking the mark and surrounding areas, shoulder rubs, and wrist marking the area adjacent to the mark. For females, we analyzed sniffing the mark and the adjacent area, as well as licking the mark. In each GLMM, we also included the non-genetic explanatory variables of trial number on a given day (i.e., 1-3), the number of times that a recipient had been presented with the secretion of a given donor over the course of the study (i.e., 1-6), as well as the secretion donor nested under secretion recipient, as a random term. For each behavioral response, we used either a Poisson or negative binomial distribution depending on the dispersion of the data (Supplemental Table 5) and applied a zero-inflation correction factor if appropriate. Initially, each GLMM was constructed using all explanatory terms, including both a linear and quadratic term for the genetic variable to account for potential nonlinear relationships. The GLMM with the lowest AIC value was chosen for further exploration, for which we sequentially dropped explanatory terms, then compared these models using AIC values. We report only the best fit models for each response variable below.

396

## 397 **RESULTS**

398

### 399 *Signaling of individual quality via odor-gene covariance*

400 We found that both sexes of ring-tailed lemurs signaled individual MHC quality via genital  
401 secretion chemistry, although the correlates of signaling differed between males and females:  
402 Male MHC diversity was positively correlated with chemical diversity, regardless of season  
403 (Figure 1; Table 2). Removal of the most diverse male from the analyses still resulted in  
404 significant relationships between MHC-DRB diversity and Shannon diversity ( $P = 0.011$ ),  
405 between MHC-DRB and season ( $P = 0.007$ ), and a trend toward significance for the interaction  
406 between MHC-DRB diversity, Shannon diversity, and season ( $P = 0.068$ ). By contrast, female  
407 MHC diversity was unrelated to overall chemical diversity in either season (Figure 2; Table 3);



408 nevertheless, it was negatively correlated to the diversity of two important subsets of chemicals,  
409 FAs and FAEs, during the nonbreeding season. Similarly, removal of the most diverse female  
410 from the analysis of overall Shannon diversity and MHC-DRB diversity results in no significant  
411 relationships. After removal of the same female from the analyses of the chemical subsets of  
412 fatty acids and fatty acid esters, the interaction between season and MHC-DRB diversity in  
413 relation to Shannon diversity of fatty acids is no longer statistically significant although still  
414 trending in the same direction ( $P = 0.10$ ). The relationship between fatty acid ester Shannon  
415 index in females and season retains a trending relationship ( $P = 0.053$ ) and MHC-DRB diversity  
416 ( $P = 0.067$ ), although their interaction is not significant ( $P = 0.161$ ).

417

#### 418 *Signaling of relatedness via dyadic, odor-gene covariance*

419 In all same-sex lemur dyads, genital olfactory cues encoded information about MHC  
420 distance, but in a season-dependent fashion (Figure 3; Table 4). After controlling for covariates,  
421 chemical distances between MM dyads correlated with unique MHC supertypes during the  
422 breeding season ( $P < 0.001$ , Figure 3A-B), but not during the nonbreeding season ( $P = 0.270$ ,  
423 Figure 3C-D). Similarly, for FF dyads, we observed significant, season-specific correlations  
424 between the number of unique MHC supertypes and chemical distances (breeding season  $P <$   
425  $0.001$ , Figures 3E-F; nonbreeding season  $P = 0.729$ , Figure 3G-H).

426 Although we could not find any relationship between chemical distance and MHC distance  
427 between MF dyads in the breeding season ( $r = 0.0014$ ,  $P = 0.8280$ ; Figure 4A), but we did find a  
428 trending negative relationship between mixed-sex dyads during the nonbreeding season ( $r = -$   
429  $0.0099$ ,  $P = 0.0647$ ; Figure 4B).

430

#### 431 *Olfactory discrimination of MHC genotype between mixed-sex conspecifics*

432           Although in the breeding season, we could only detect the chemical signaling of MHC  
433 diversity in males, both male (Table 5; Figure 5) and female (Figure 6) recipients showed  
434 significant behavioral discrimination between the genital secretions of opposite-sex, conspecific  
435 donors based on their possession of different MHC-DRB genotypes. The pattern of response to  
436 conspecific secretions, however, differed between the sexes.

437           Male recipients did not differ in the time they spent in proximity to either of the scented  
438 dowels, nor did they differ in the number of wrist marks they directed to the area adjacent the  
439 mark; however, they investigated female secretions more if the donors were more similar at the  
440 MHC-DRB to themselves than if the donors were more dissimilar at the MHC-DRB. Specifically,  
441 compared to their responses to the secretions of MHC-DRB dissimilar females, male recipients  
442 spent more time sniffing the secretions of MHC-DRB similar females, more time sniffing the  
443 area adjacent to the mark, and responded with more shoulder rubs (Table 5; Figure 5).  
444 Additionally, as the absolute MHC-DRB diversity of female donors increased, male recipients  
445 also licked the mark more frequently (Table 5). Because the frequency of occurrence and  
446 duration of behavior were correlated for licking, shoulder rubbing, and wrist marking, we report  
447 on only one measure (either frequency or duration) per behavior (Table 5; Figure 5).

448           Female recipient responses to the mark itself did not differ according to the MHC-DRB  
449 diversity of male donors; nevertheless, female recipients did direct differential responses  
450 towards the areas adjacent to the male's mark. Specifically, as the MHC-DRB amino acid  
451 dissimilarity of the male donor increased, female recipients spent more time sniffing areas  
452 adjacent to the mark ( $z$  value = 3.11,  $P$  = 0.002; Figure 6).

453

## 454 **DISCUSSION**

455           Owing to its role in survival and reproductive success, immunogenetic diversity is an  
456 important predictor of mate quality and preference and may be signaled via visual or chemical  
457 means. Our study provides support for the socially salient, chemical signaling of genetic quality

458 in a strepsirrhine primate, as would be necessary according to the good genes and good fit  
459 paradigm for choosing a mate or social partner. Despite sex differences in the chemical  
460 'indicators' of quality and their seasonal emergence, ring-tailed lemurs of both sexes signaled  
461 their MHC diversity and dissimilarity to conspecifics via the volatile component of their genital  
462 secretions. Moreover, both sexes were able to use these and potentially other olfactory cues to  
463 discriminate relevant information about the MHC genotypes of opposite-sex conspecifics. These  
464 results confirm the functional significance of our previous work showing detectable relationships  
465 between chemical diversity and microsatellite diversity in both sexes (Charpentier et al. 2008,  
466 Boulet et al. 2010, Charpentier et al. 2010). Our results also provide a foundation from which to  
467 explore if ring-tailed lemurs actually choose mates according to the good genes and/or good fit  
468 models using reproductive success data from wild populations.

469 More specifically, males appeared to signal both MHC-DRB diversity and microsatellite  
470 diversity, or their good genes, in a similar fashion: Both measures of genetic diversity were  
471 positively correlated with overall chemical diversity of genital secretions, although the  
472 relationship with microsatellite diversity only emerged in the breeding season, whereas the MHC  
473 odor-gene covariance emerged regardless of season (albeit more strongly in the breeding  
474 season). Females, however, signaled their good genes, i.e., genetic diversity, via specific  
475 chemicals, e.g., fatty acids and fatty acid esters. Previously, we had shown that females  
476 signaled increased microsatellite diversity via a negative relationship with the diversity of fatty  
477 acids during the breeding season. Here, we show that females signal MHC diversity via a  
478 negative relationship with FA and FAE diversity, but in the nonbreeding season instead.

479 Potentially, females may be signaling different information depending on the season.  
480 During the breeding season, signaling genome-wide microsatellite diversity and relatedness  
481 may be critical to avoid inbreeding (Boulet et al. 2009, 2010). In contrast, signaling MHC-  
482 specific diversity and health during the nonbreeding season might convey health and  
483 competitive ability during periods of intense female-female competition (e.g., López-Idiáquez et

484 al. 2016). The months of pregnancy and lactation are energetically expensive for female ring-  
485 tailed lemurs (O'Mara & Hickey 2014). Additionally, intragroup female competition for access to  
486 food increases (Sauther 1993, Gould et al. 2003). During these social disputes, the killing of  
487 vulnerable infants is a significant risk, and is committed by both sexes (Hood 1994, Jolly et al.  
488 2000, Ichino 2005, Charpentier & Drea 2013, Kittler & Dietzel 2016). Signaling one's health and  
489 vitality may reduce the likelihood of aggressive encounters that could lead to infanticide by  
490 competing females (reviewed in Stockley & Campbell 2013).

491 Our results contrast the lack of odor-gene covariance found in mandrills (*Mandrillus*  
492 *sphinx*), the only other primate in which a relationship between secretion chemistry and MHC  
493 diversity has been investigated. In both male and female mandrills, MHC diversity was unrelated  
494 with the chemical diversity of secretions obtained from the surface of the sternal gland (Setchell  
495 et al. 2011). MHC information, however, may be signaled through aspects of their olfactory  
496 signature that were not analyzed by the authors. For instance, just as female ring-tailed lemurs  
497 signal MHC and microsatellite diversity through a subset of chemicals (i.e., fatty acids and fatty  
498 acid esters; Boulet et al. 2010), so too might MHC-DRB information be contained in the  
499 composition and relative abundance of a subset of the compounds present in certain secretions.  
500 Alternatively, information may be encoded in the non-volatile portion of the secretion (Hurst et  
501 al. 2001, Beynon et al. 2002, Brennan & Zufall 2006, Kwatra & Drea 2007) or be signaled  
502 through the composition of the microbiota present in the gland (Boehm & Zufall 2006, Zomer et  
503 al. 2009, Archie & Theis 2011, Pearce et al. 2017) and the odorants they produce (Gorman et  
504 al. 1974, Theis et al. 2013). Further exploration of individual compounds, specific subsets of  
505 chemicals, or the non-volatile fraction of the mandrill secretion might yield a signaling pattern  
506 that conveys information about MHC genotype. Such evidence would support findings that male  
507 mandrills appear to use the MHC genotype of a potential mate for mate guarding decisions  
508 (Setchell et al. 2016) and that MHC diversity is correlated with male reproductive success  
509 (Setchell et al. 2010).

510           The chemical composition of lemur genital secretions also signals MHC dissimilarity, or fit,  
511 between male-male, female-female, and male-female dyads, echoing previous results  
512 demonstrating the same pattern for microsatellite diversity (Charpentier et al. 2008, Boulet et al.  
513 2009 & 2010). Signaling relatedness to any potential social ‘partner’ could be relevant  
514 throughout the year, to avoid related competitors or beneficially direct nepotism (Charpentier et  
515 al. 2008, 2010). Signaling relatedness or compatibility to opposite sex conspecifics would be  
516 particularly important in the breeding season to avoid inbreeding and maximize offspring  
517 diversity (Brown 1999, Tregenza & Wedell 2000, Neff & Pitcher 2005). Evidence now exists that  
518 odorants signal MHC dissimilarity within same-sex and opposite-sex dyads in two taxa formerly  
519 thought to be primarily visually oriented, namely birds (black-legged kittiwake: Leclaire et al.  
520 2014; song sparrows: Slade et al. 2016) and anthropoid primates (mandrills: Setchell et al.  
521 2011), suggesting greater relevance of olfactory cues than previously suspected.

522           Regarding behavior, our male recipients responded most to the scent of females that had  
523 the most similar MHC-DRB genotypes to their own. Such a pattern may reflect ‘preferences,’  
524 indicating that males may be avoiding outbreeding depression (Sommer 2005b), seemingly  
525 contrary to the good fit prediction that individuals should choose mates to maximize their  
526 dissimilarity. Nevertheless, an increase in response time may not necessarily indicate an  
527 increase in interest. Instead, increased male investigation could simply reflect that more  
528 processing time was required to decipher the female’s potential as a mate. Previously, in a  
529 study of microsatellite diversity, we had shown that male ring-tailed lemurs spent more time  
530 sniffing the secretions of less-related females (Charpentier et al. 2010). Regardless of the  
531 potential contradiction, both sets of findings indicate that male ring-tailed lemurs are minimally  
532 able to discriminate conspecifics according to both overall genetic relatedness and MHC  
533 diversity/dissimilarity. Lastly, our finding that female ring-tailed lemurs spent the most time  
534 sniffing the vicinity of secretions from MHC-DRB dissimilar males complements previous work

535 showing that females of other species show greater response to the scents of more MHC  
536 dissimilar males than of more MHC-diverse males.

537 We have confirmed an honest olfactory mechanism of ornamentation and potential mate  
538 choice, namely via genital odor-MHC gene covariance and discrimination, in both sexes of ring-  
539 tailed lemurs. Likewise, information about immunogenetic quality and similarity may also  
540 influence general social behavior, specifically for prioritizing agonistic or nepotistic interactions.  
541 Female lemurs are expected to be choosy under the traditional paradigm of sexual selection  
542 (Trivers 1972); however, mate choice may be equally important for male ring-tailed lemurs  
543 (Parga 2006). In this species, females socially dominate their male conspecifics (Jolly 1966),  
544 are strictly seasonal and generally fertile only 1-3 times per year for a period of less than 24  
545 hours (Evans & Goy 1968, Van Horn & Resko 1977), and often cycle somewhat synchronously  
546 with other females in the social group (Pereira 1991). Thus, both sexes should be choosy about  
547 the competitive effort directed towards their potential partners. Our data extend the potential for  
548 olfactory-based MHC discrimination across the primate order and add to a growing body of  
549 literature suggesting that mate choice may depend on both MHC dissimilarity and diversity  
550 (Kamiya et al. 2014).

551

552 **Acknowledgements**

553 This work was supported by the National Science Foundation (BCS #0409367, IOS #0719003)  
554 to CMD, the Duke University Center for Science Education to KEG, and Duke University to  
555 CMD and KEG. We would like to thank the staff and animal technicians of the Duke Lemur  
556 Center, the Indianapolis Zoo, and the Cincinnati Zoo for their assistance during sample  
557 collection and bioassay trials. We are especially grateful to Erin Ehmke, David Brewer, and Britt  
558 Keith at the Duke Lemur Center, to Lynn Villers, Robert Shumaker, and Holly Blaylock at the  
559 Indianapolis Zoo and to Terri Roth and Ronald Evans at the Cincinnati Zoo. We could not have  
560 accomplished this study without them. We would also like to thank Jillian Wisse for her help with  
561 conducting the bioassays, as well as Laura Damiani and Bernice Kwan for their help in scoring  
562 the videos. This manuscript is DLC publication #XXXX.

563

564 **Author Contributions**

565 CMD and KEG conceived of the idea for this study with help from MB & RLH. KEG produced  
566 the MHC-DRB genotypes and conducted the behavioral bioassays, and MB & RLH produced  
567 the secretion chemistry data. KEG, MB, & RLH performed the analyses and KEG wrote the  
568 original draft of the manuscript. CMD critically revised the manuscript with assistance from KEG,  
569 RLH, and MB. All authors have approved the final manuscript for publication.

570

571 **Data Accessibility**

572 CSV files of MHC, chemical, and behavioral data from bioassays, will be deposited into Dryad.  
573 Analyses reported in this article can be reproduced using these data.

574

575 **Conflict of Interest**

576 The authors declare no conflict of interest.

577



578 **REFERENCES**

- 579 Aeschlimann PB, Haberli MA, Reusch TBH, Boehm T, & Milinski M. 2003. Female sticklebacks,  
580 *Gasterosteus aculeatus*, use self-reference to optimize MHC allele number during mate  
581 selection. *Behavioral Ecology and Sociobiology* 54: 119-126.
- 582 Andersson M. 1994. *Sexual Selection*. Princeton, New Jersey. Princeton University Press.
- 583 Aksenov AA, Gojova A, Zhao W, Morgan JT, Sankaran S, Sandrock CE, & Davis CE. 2012.  
584 Characterization of Volatile Organic Compounds in Human Leukocyte Antigen Heterologous  
585 Expression Systems: A Cell's "Chemical Odor Fingerprint." *ChemBioChem* 13: 1053–1059.
- 586 Archie E & Theis K. 2011. Animal behaviour meets microbial ecology. *Animal Behaviour* 82:  
587 425-436.
- 588 Beynon RJ, Veggerby C, Payne CE, Robertson DHL, Gaskell SJ, Humphries RE, & Hurst JL.  
589 2002. Polymorphism in major urinary proteins: molecular heterogeneity in a wild mouse  
590 population. *Journal of Chemical Ecology* 28 (7): 1429-1446.
- 591 Blaustein AR. 1981. Sexual selection and mammalian olfaction. *The American Naturalist* 117:  
592 1006-1010.
- 593 Boehm T & Zufall F. 2006. MHC peptides and the sensory evaluation of genotype. *Trends in*  
594 *Neurosciences* 29: 100-107.
- 595 Bonneaud C, Chastel O, Federici P, Westerdahl H, & Sorci G. 2006. Complex Mhc-based mate  
596 choice in a wild passerine. *Proceedings of the Royal Society of London, B Biological*  
597 *Sciences* 273: 1111-1116.
- 598 Boulet M, Charpentier MJE, & Drea CM. 2009. Decoding an olfactory mechanism of kin  
599 recognition and inbreeding avoidance in a primate. *BMC Evolutionary Biology* 9 (1): 281-  
600 292.
- 601 Boulet M, Crawford JC, Charpentier MJE, & Drea CM. 2010. Honest olfactory ornamentation in  
602 a female-dominant primate. *Journal of Evolutionary Biology* 23: 1558-1563.
- 603 Brennan PA & Zufall F. 2006. Pheromonal communication in vertebrates. *Nature* 444: 308-315.
- 604 Brown JH, Jardetzky TS, Gorga JC, Stern LJ, Urban RG, Strominger JL, & Wiley DC. 1993.  
605 Three-dimensional structure of the human class II histocompatibility antigen HLA-DR1.  
606 *Nature* 364(6432): 33–39.
- 607 Brown JL. 1999. The new heterozygosity theory of mate choice and the MHC. *Genetica* 104:  
608 215-221.
- 609 Burger D, Dolivo G, Marti E, Sieme H, & Wedekind C. 2015. Female major histocompatibility  
610 complex type affects male testosterone levels and sperm number in the horse (*Equus*  
611 *caballus*). *Proceedings of the Royal Society of London, B Biological Sciences* 282:  
612 20150407.
- 613 Charpentier MJE, Boulet M, & Drea CM. 2008. Smelling right: the scent of male lemurs  
614 advertises genetic quality and relatedness. *Molecular Ecology* 17: 3225-3233.



- 615 Charpentier MJE, Crawford JC, Boulet M, & Drea CM. 2010. Message 'scent': lemurs detect the  
616 genetic relatedness and quality of conspecifics via olfactory cues. *Animal Behaviour* 80:  
617 101-108.
- 618 Charpentier MJE & Drea CM. 2013. Victims of infanticide and conspecific bite wounding in a  
619 female-dominant primate: a long-term study. *PloS One* 8: e82830.
- 620 Cheng JB & Russell DW. 2004. Mammalian wax biosynthesis II. Expression cloning of wax  
621 synthase cDNAs encoding a member of the acyltransferase enzyme family. *Journal of*  
622 *Biological Chemistry* 279: 37798-37807.
- 623 Crawford JC, Boulet M, & Drea CM. 2011. Smelling wrong: hormonal contraception in lemurs  
624 alters critical female odour cues. *Proceedings of the Royal Society of London, B Biological*  
625 *Sciences* 278 (1702): 122-130.
- 626 Crawford J & Drea CM. 2015. Baby on board: olfactory cues indicate pregnancy and fetal sex in  
627 a non-human primate. *Biology Letters* 11(2): 20140831.
- 628 Ditchkoff SS, Lochmiller RL, Masters RE, Hooper SR, & Van Den Bussche RA. 2001. Major  
629 histocompatibility complex associated variation in secondary sexual traits of white-tailed  
630 deer (*Odocoileus virginianus*): evidence for good genes advertisement. *Evolution* 55: 616-  
631 625.
- 632 Doty RL, Ford M, Preti G, & Huggins GR. 1975. Changes in intensity and pleasantness of  
633 human vaginal odors during menstrual-cycle. *Science* 190: 1316-1318.
- 634 Doytchinova IA & Flower D. 2005. In silico identification of supertypes for class II MHCs. *The*  
635 *Journal of Immunology* 174: 7085–7095.
- 636 Drea CM. 2007. Sex and seasonal differences in aggression and steroid secretion in *Lemur*  
637 *catta*: are socially dominant females hormonally 'masculinized'? *Hormones & Behavior* 51  
638 (4): 555-567.
- 639 Drea CM. 2014. D'Scent of Man: A Comparative Survey of Primate Chemosignaling in Relation  
640 to Sex. *Hormones and Behavior* 68: 117-133.
- 641 Drea CM, Boulet M, delBarco-Trillo J, Greene LK, Sacha CR, Goodwin, TE & Dubay GR. 2013.  
642 The "Secret" in Secretions: Methodological Considerations in Deciphering Primate Olfactory  
643 Communication. *American Journal of Primatology* 75 (7): 621-642.
- 644 Eizaguirre C, Yeates SE, Lenz TL, Kalbe M, & Milinski M. 2009. MHC-based mate choice  
645 combines good genes and maintenance of MHC polymorphism. *Molecular Ecology* 18 (15):  
646 3316-3329.
- 647 Ekblom R, Saether SA, Grahn M, Fiske P, Kålås JA, & Höglund J. 2004. Major  
648 histocompatibility complex variation and mate choice in a lekking bird, the great snipe  
649 (*Gallinago media*). *Molecular Ecology* 13: 3821-3828.
- 650 Evans CS & Goy RW. 1968. Social behaviour and reproductive cycles in captive ring-tailed  
651 lemurs (*Lemur catta*). *Journal of Zoology* 156: 181-197.

- 652 Evans ML, Dionne M, Miller KM, & Bernatchez L. 2012. Mate choice for major histocompatibility  
653 complex genetic divergence as a bet-hedging strategy in the Atlantic salmon (*Salmo salar*).  
654 *Proceedings of the Royal Society of London, B Biological Sciences* 279: 379-386.
- 655 Forsberg LA, Dannewitz J, Petersson E, & Grahn M. 2007. Influence of genetic dissimilarity in  
656 the reproductive success and mate choice of brown trout - females fishing for optimal MHC  
657 dissimilarity. *Journal of Evolutionary Biology* 20: 1859-1869.
- 658 Freeman-Gallant CR, Meguerdichian M, Wheelwright NT, & Sollecito SV. 2003. Social pairing  
659 and female mating fidelity predicted by restriction fragment length polymorphism similarity at  
660 the major histocompatibility complex in a songbird. *Molecular Ecology* 12 (11): 3077–3083.
- 661 Garren S. 2016. jmuOutlier: Permutation tests for nonparametric statistics. R package version  
662 1.1. See <http://CRAN.R-project.org/package=jmuOutlier>.
- 663 Gorman ML, Nedwell DB, & Smith RM. 1974. An analysis of the contents of the anal scent  
664 pockets of *Herpestes auropunctatus* (Carnivora: Veverridae). *Journal of Zoology* 172: 389-  
665 399.
- 666 Goudet J. 2001. FSTAT, a program to estimate and test gene diversities and fixation indices  
667 (version 2.9.3). See <http://www2.unil.ch/popgen/softwares/fstat.html>.
- 668 Gould L, Sussman RW, & Sauther ML. 2003. Demographic and life-history patterns in a  
669 population of ring-tailed lemurs (*Lemur catta*) at Beza Mahafaly Reserve, Madagascar: A 15-  
670 year perspective. *American Journal of Physical Anthropology* 120 (2): 182-194.
- 671 Greene LK, Grogan KE, Smyth KN, Adams CA, Klager SA, & Drea CM. 2016. Mix it and fix it:  
672 functions of composite olfactory signals in ring-tailed lemurs. *Royal Society Open Science* 3:  
673 160076.
- 674 Grogan KE. 2018. Data from: MHC genetic variation influences both olfactory signals and scent  
675 discrimination in ring-tailed lemurs. *Behavioral Ecology*. Link: To be determined.
- 676 Grogan KE, McGinnis GJ, Sauther ML, Cuozzo FP, Drea CM. 2016. Next-generation  
677 genotyping of hypervariable loci in many individuals of a non-model species: technical and  
678 theoretical implications. *BMC Genomics* 17: 204.
- 679 Grogan KE, Sauther ML, Cuozzo FP & Drea CM. 2017. Genetic wealth, population health:  
680 Major histocompatibility complex variation in captive and wild ring-tailed lemurs (*Lemur*  
681 *catta*). *Ecology and Evolution* 7 (19): 7638-7649.
- 682 Hargrove JL, Greenspan P, & Hartle DK. 2004. Nutritional significance and metabolism of very  
683 long chain fatty alcohols and acids from dietary waxes. *Experimental Biology and Medicine*  
684 229(3): 215-226.
- 685 Havlicek J & Roberts SC. 2009. MHC-correlated mate choice in humans: a review.  
686 *Psychoneuroendocrinology* 34(4): 497–512.
- 687 Hettyey A, Hegyi G, Puurtinen M, Hoi H, Török J, & Penn DJ. 2010. Mate Choice for Genetic  
688 Benefits: Time to Put the Pieces Together. *Ethology* 116: 1-9.

- 689 Hood LC. 1994. Infanticide among ringtailed lemurs (*Lemur catta*) at Berenty Reserve,  
690 Madagascar. *American Journal of Primatology* 33: 65-69.
- 691 Huchard E, Albrecht C, Schliehe-Diecks S, Baniel A, Roos C, Kappeler PM, & Brameier M.  
692 2012. Large-scale MHC class II genotyping of a wild lemur population by next generation  
693 sequencing. *Immunogenetics*, 64(12): 895–913.
- 694 Huchard E, Baniel A, Schliehe-Diecks S, & Kappeler PM. 2013. MHC-disassortative mate  
695 choice and inbreeding avoidance in a solitary primate. *Molecular Ecology* 22: 4071-4086.
- 696 Hurst JL, Payne CE, Nevison CM, Marie AD, Humphries RE, Robertson DHL, Cavaggioni A, &  
697 Beynon RJ. 2001. Individual recognition in mice mediated by major urinary proteins. *Nature*  
698 414: 631-634.
- 699 Ichino S. 2005. Attacks on a wild infant ring-tailed lemur (*Lemur catta*) by immigrant males at  
700 Berenty, Madagascar: Interpreting infanticide by males. *American Journal of Primatology* 67:  
701 267-272.
- 702 Johansson BG & Jones TM. 2007. The role of chemical communication in mate choice.  
703 *Biological reviews of the Cambridge Philosophical Society* 82: 265-89.
- 704 Jolly A. 1966. *Lemur Behavior: A Madagascar Field Study*. Chicago, Illinois. University of  
705 Chicago Press.
- 706 Jolly A, Caless S, Cavigelli S, Gould L, Pereira ME, Pitts A, Pride RE, Rabenandrasana HD,  
707 Walker JD, & Zafison T. 2000. Infant killing, wounding and predation in *Eulemur* and *Lemur*.  
708 *International Journal of Primatology* 21: 21-40.
- 709 Kaesler E, Kappeler PM, Brameier M, Demeler J, Kraus C, Rakotoniaina JH, Hämäläinen AM, &  
710 Huchard E. 2017. Shared evolutionary origin of MHC polymorphism in sympatric lemurs.  
711 *Molecular Ecology* 26(20): 5629-5645.
- 712 Kamiya T, O'Dwyer K, Westerdahl H, Senior A, & Nakagawa S. 2014. A quantitative review of  
713 MHC-based mating preference: The role of diversity and dissimilarity. *Molecular Ecology* 23  
714 (21): 5151–5163.
- 715 Kempnaers B. 2007. Mate Choice and Genetic Quality: A Review of the Heterozygosity  
716 Theory. *Advances in the Study of Behavior* 37: 189-278.
- 717 Kittler K & Dietzel S. 2016. Female infanticide and female-directed lethal targeted aggression in  
718 a group of ring-tailed lemurs (*Lemur catta*). *Primate Biology* 3 (2): 41–46.
- 719 Knapp LA, Robson J, & Waterhouse JS. 2006. Olfactory signals and the MHC: a review and a  
720 case study in *Lemur catta*. *American Journal of Primatology* 68(6): 568–584.
- 721 Kromer J, Hummel T, Pietrowski D, Giani AS, Sauter J, Ehninger G, Schmidt AH, & Croy I. 2016.  
722 Influence of HLA on human partnership and sexual satisfaction. *Scientific Reports* 6: 32550.
- 723 Kwak J, Willse A, Preti G, Yamazaki K, & Beauchamp GK. 2010. In search of the chemical  
724 basis for MHC odourtypes. *Proceedings of the Royal Society of London, B Biological*  
725 *Sciences* 277: 2417-2425.

- 726 Kwatra SG & Drea CM. 2007. *Proteomic analysis of ringtailed lemur scent gland secretions:*  
727 *glandular- and individual-specific protein profiles*, Poster presented at the 30th Meeting of  
728 the American Society of Primatologists. Winston-Salem, NC. (Abstract: *American Journal of*  
729 *Primatology* 69 Supplement 159: 108-109.
- 730 Landry C, Garant D, Duchesne P, & Bernatchez L. 2001. 'Good genes as heterozygosity': the  
731 major histocompatibility complex and mate choice in Atlantic salmon (*Salmo salar*).  
732 *Proceedings of the Royal Society of London, B Biological Sciences* 268: 1279-1285.
- 733 Lanyon CV, Rushton SP, O'Donnell AG, Goodfellow M, Ward AC, Petrie M, Jensen SP, Gosling  
734 LM, & Penn DJ. 2007. Murine scent mark microbial communities are genetically determined.  
735 *FEMS Microbiology Ecology* 59: 576-583.
- 736 Leclaire S, van Dongen WFD, Voccia S, Merklings T, Ducamp C, Hatch SA, Blanchard P,  
737 Danchin E, & Wagner RH. 2014. Preen secretions encode information on MHC similarity in  
738 certain sex-dyads in a monogamous seabird. *Scientific Reports* 4: 6920.
- 739 Leclaire S, Jacob S, Greene LK, Dubay GR, & Drea CM. 2017a. Social odours covary with  
740 bacterial community in the anal secretions of wild meerkats. *Scientific Reports* 7.
- 741 Leclaire S, Strandh M, Mardon J, Westerdahl H, & Bonadonna F. 2017b. Odour-based  
742 discrimination of similarity at the major histocompatibility complex in birds. *Proceedings of*  
743 *the Royal Society of London, B Biological Science* 284: 20162466.
- 744 Legendre P & Legendre L. 1998. *Numerical Ecology*. Amsterdam, The Netherlands, Elsevier  
745 Science BV.
- 746 Leinders-Zufall T, Brennan P, Widmayer P, Chandramani P, Maul-Pavicic A, Jager M, Li X-H,  
747 Breer H, Zufall F, & Boehm T. 2004. MHC class 1 peptides as chemosensory signals in the  
748 vomeronasal organ. *Science* 306: 1033-1037.
- 749 López-Idiáquez D, Vergara P, Fargallo JA, & Martínez-Padilla J. 2016. Female plumage  
750 coloration signals status to conspecifics. *Animal Behaviour* 121: 101-106.
- 751 Martin P & Bateson P. 2007. *Measuring Behavior: An Introductory Guide*. New York, New York.  
752 Cambridge University Press.
- 753 Matsumoto-Oda A, Oda R, Hayashi Y, Murakami H, Maeda N, Kumazaki K, Shimizu K, &  
754 Matsuzawa T. 2003. Vaginal fatty acids produced by chimpanzees during menstrual cycles.  
755 *International Journal of Primatology* 74: 75-79.
- 756 Mays HL & Hill GE. 2004. Choosing mates: good genes versus genes that are a good fit.  
757 *Trends in Ecology and Evolution* 19: 554-559.
- 758 McCune B, Grace JB, & Urban DL. 2002. *Analysis of Ecological Communities*. MjM Software  
759 Design, Gleneden Beach, OR.
- 760 McCune B & Mefford MJ. 2016. *PC-ORD. Multivariate Analysis of Ecological Data Version 7*.  
761 MjM Software Design, Gleneden Beach, OR.

- 762 Michael RP, Bonsall RW, & Warner P. 1974. Human vaginal secretions: volatile fatty acid  
763 content. *Science* 186: 1217-1219.
- 764 Milinski M. 2014. Arms races, ornaments and fragrant genes: the dilemma of mate choice in  
765 fishes. *Neuroscience & Biobehavioral Reviews* 46: 567-572.
- 766 Milinski M, Griffiths S, Wegner KM, Reusch TBH, Haas-Assenbaum A, & Boehm T. 2005. Mate  
767 choice decisions of stickleback females predictably modified by MHC peptide ligands.  
768 *Proceedings of the National Academy of Sciences of the United States of America* 102:  
769 4414-4418.
- 770 Neff BD & Pitcher TE. 2005. Genetic quality and sexual selection: an integrated framework for  
771 good genes and compatible genes. *Molecular Ecology* 14: 19-38.
- 772 Neff BD, Garner SR, Heath JW, & Heath DD. 2008. The MHC and non-random mating in a  
773 captive population of Chinook salmon. *Heredity* 101 (2): 175–185.
- 774 Ober C. 1999. Studies of HLA, fertility and mate choice in a human isolate. *Human  
775 Reproduction Update* 5: 103–7.
- 776 Olsson M, Madsen T, Nordby J, Wapstra E, Ujvari B, & Wittsell H. 2003. Major histocompatibility  
777 complex and mate choice in sand lizards. *Proceedings of the Royal Society B Biological  
778 Sciences*, 270: S254–S256.
- 779 Olsson M, Madsen T, Ujvari B, & Wapstra E. 2004. Fecundity and MHC affects ejaculation  
780 tactics and paternity bias in sand lizards. *Evolution* 58 (4): 906-909.
- 781 O'Mara MT & Hickey CM. 2014. The development of sex differences in ring-tailed lemur feeding  
782 ecology. *Behavioral Ecology and Sociobiology* 68: 1273-1286.
- 783 Parga JA. 2006. Male mate choice in *Lemur catta*. *International Journal of Primatology* 27 (1):  
784 107-131.
- 785 Pearce DS, Hoover BA, Jennings S, Nevitt GA, & Docherty KM. 2017. Morphological and  
786 genetic factors shape the microbiome of a seabird species (*Oceanodroma leucorhoa*) more  
787 than environmental and social factors. *Microbiome* 5 (1): 146.
- 788 Pechouskova E, Dammhahn M, Brameier M, Fichtel C, Kappeler PM, & Huchard E. 2015. MHC  
789 class II variation in a rare and ecological specialist mouse lemur reveals lower allelic  
790 richness and contrasting selection patterns compared to a generalist and widespread  
791 sympatric congener. *Immunogenetics*, 67 (4): 229–245
- 792 Penn DJ. 2002. The scent of genetic compatibility: sexual selection and the major  
793 histocompatibility complex. *Ethology* 108: 1-21.
- 794 Penn D & Potts WK. 1998a. Chemical signals and parasite-mediated sexual selection. *Trends in  
795 Ecology & Evolution* 13: 391-395.
- 796 Penn D & Potts W. 1998b. How do major histocompatibility complex genes influence odor and  
797 mating preferences? *Advances in Immunology* 69: 411-436.



- 798 Penn DJ & Potts WK. 1999. The evolution of mating preferences and major histocompatibility  
799 complex genes. *American Naturalist* 153: 145-164.
- 800 Piertney SB & Oliver MK. 2006. The evolutionary ecology of the major histocompatibility  
801 complex. *Heredity* 96: 7-21.
- 802 Qvarnstrom A. 2001. Context-dependent genetic benefits from mate choice. *Trends in Ecology*  
803 *& Evolution* 16: 5-7.
- 804 Radwan J, Tkacz A, & Kloch A. 2008. MHC and Preferences for Male Odour in the Bank Vole.  
805 *Ethology* 114: 827-833.
- 806 Reusch TB, Haberli MA, Aeschlimann PB, & Milinski M. 2001. Female sticklebacks count alleles  
807 in a strategy of sexual selection explaining MHC polymorphism. *Nature* 414: 300-302.
- 808 Richardson DS, Komdeur J, Burke T, & Von Schantz T. 2005. MHC-based patterns of social  
809 and extra-pair mate choice in the Seychelles warbler. *Proceedings of the Royal Society of*  
810 *London, B Biological Sciences* 272: 759-767.
- 811 RStudio Team. 2015. RStudio: Integrated Development for R. RStudio, Inc., Boston, MA. See  
812 <http://www.rstudio.com/>.
- 813 Ruff JS, Nelson AC, Kubinak JL, & Potts WK. 2012. MHC Signaling during Social  
814 Communication. Pgs 290-313. In: *Self and Nonself*. López-Larrea C (Eds). Springer, New  
815 York, New York, USA.
- 816 Sandberg M, Eriksson L, Jonsson J, Sjöström M, & Wold S. 1998. New chemical descriptors  
817 relevant for the design of biologically active peptides. A multivariate characterization of 87  
818 amino acids. *Journal of Medicinal Chemistry* 41 (14): 2481–2491.
- 819 Sauther ML. 1993. The dynamics of feeding competition in wild populations of ringtailed lemurs  
820 (*Lemur catta*). In: Kappeler PM & Ganzhorn JU (Eds.). *Lemur social systems and their*  
821 *ecological basis*, pp. 135-152. New York, New York. Plenum.
- 822 Schwensow N, Fietz J, Dausmann K, & Sommer S. 2007. MHC-associated mating strategies  
823 and the importance of overall genetic diversity in an obligate pair-living primate. *Evolutionary*  
824 *Ecology* 22: 617-636.
- 825 Schwensow N, Eberle M, & Sommer S. 2008. Compatibility counts: MHC-associated mate  
826 choice in a wild promiscuous primate. *Proceedings of the Royal Society of London, B*  
827 *Biological Sciences* 275: 555-564.
- 828 Scordato ES & Drea CM. 2007. Scents and sensibility: Information content of olfactory signals in  
829 the ringtailed lemur (*Lemur catta*). *Animal Behaviour* 73 (2): 301-314.
- 830 Scordato ES, Dubay G, & Drea CM. 2007. Chemical composition of scent marks in the  
831 ringtailed lemur (*Lemur catta*): glandular differences, seasonal variation and individual  
832 signatures. *Chemical Senses* 32: 493-504.

- 833 Setchell JM, Charpentier M, Abbott KA, Wickings EJ, & Knapp LA. 2009. Is brightest best?  
834 Testing the Hamilton-Zuk hypothesis in mandrills. *International Journal of Primatology* 30:  
835 825-844.
- 836 Setchell JM, Charpentier MJE, Abbott KM, Wickings EJ, & Knapp LA. 2010. Opposites attract:  
837 MHC-associated mate choice in a polygynous primate. *Journal of Evolutionary Biology* 23  
838 (1): 136-148.
- 839 Setchell JM, Vaglio S, Abbott KM, Moggi-Cecchi J, Boscaro F, Pieraccini G, & Knapp LA. 2011.  
840 Odour signals major histocompatibility complex genotype in an Old World monkey.  
841 *Proceedings of the Royal Society of London, B Biological Sciences* 278 (1703): 274-280.
- 842 Setchell JM, Richards SA, Abbott KM, & Knapp LA. 2016. Mate-guarding by male mandrills  
843 (*Mandrillus sphinx*) is associated with female MHC genotype. *Behavioral Ecology* 27 (6):  
844 1756-1766.
- 845 Singh PB, Brown RE, & Roser B. 1987. MHC antigens in urine as olfactory recognition cues.  
846 *Nature* 327: 161-164.
- 847 Slade JWG, Watson MJ, Kelly TR, Gloor GB, & Bernards MA. 2016. Chemical composition of  
848 preen wax reflects major histocompatibility complex similarity in songbirds. *Proceedings of*  
849 *the Royal Society B: Biological Sciences* 283: 20161966.
- 850 Sommer S. 2005a. The importance of immune gene variability (MHC) in evolutionary ecology  
851 and conservation. *Frontiers in Zoology* 2 (16).
- 852 Sommer S. 2005b. Major histocompatibility complex and mate choice in a monogamous rodent.  
853 *Behavioral Ecology and Sociobiology* 58: 181-189.
- 854 Sommer S, Courtiol A, & Mazzone CJ. 2013. MHC genotyping of non-model organisms using  
855 next-generation sequencing: a new methodology to deal with artefacts and allelic dropout.  
856 *BMC Genomics*, 14 (1): 542.
- 857 Stockley P & Campbell A. 2013. Female competition and aggression: interdisciplinary  
858 perspectives. *Philosophical Transactions of the Royal Society B* 368: 20130073.
- 859 Sturn A, Quackenbush J, & Trajanoski Z. 2002. Genesis: cluster analysis of microarray data.  
860 *Bioinformatics* 18 (11): 207-208.
- 861 Theis KR, Venkataraman A, Dycus JA, Koonter KD, & Schmitt-matzen EN. 2013. Symbiotic  
862 bacteria appear to mediate hyena social odors. *Proceedings of the National Academy of*  
863 *Sciences of the United States of America* 110 (49): 19832-19837.
- 864 Tregenza T & Wedell N. 2000. Genetic compatibility, mate choice and patterns of parentage.  
865 *Molecular Ecology* 9: 1013-1027.
- 866 Trivers RL. 1972. Parental investment and sexual selection. In: Campbell B (Ed.). *Sexual*  
867 *Selection and the Descent of Man*, pp. 136-179. Chicago, Illinois. Aldine.
- 868 Van Horn RN & Resko JA. 1977. The reproductive cycle of the ringtailed lemur (*Lemur catta*):  
869 sex steroid levels and sexual receptivity under controlled photoperiods. *Endocrinology* 101:  
870 1579-1586.

- 871 Willse A, Belcher AM, Preti G, Wahl JH, Thresher M, Yang P, Yamazaki K, & Beauchamp GK.  
872 2005. Identification of major histocompatibility complex-regulated body odorants by  
873 statistical analysis of a comparative gas chromatography/mass spectrometry experiment.  
874 *Analytical Chemistry* 77: 2348-2361.
- 875 Winternitz J, Abbate JL, Huchard E, Havlicek J, & Garamszegi LZ. 2016. Patterns of MHC-  
876 dependent mate selection in humans and non-human primates: a meta-analysis. *Molecular*  
877 *Ecology* 26 (2): 668-688.
- 878 Winternitz JC, Minchey SG, Garamszegi LZ, Huang S, Stephens PR, & Altizer S. 2013. Sexual  
879 selection explains more functional variation in the mammalian major histocompatibility  
880 complex than parasitism. *Proceedings of the Royal Society of London, B Biological*  
881 *Sciences* 280: 20131605.
- 882 Yamazaki K, Boyse EA, Mike V, Thaler HT, Mathieson BJ, Abbott J, Boyse J, Zayas ZA, &  
883 Thomas L. 1976. Control of mating preferences in mice by genes in the major  
884 histocompatibility complex. *Journal of Experimental Medicine* 144: 1324-1335.
- 885 Yang Z. 2007. PAML 4: Phylogenetic Analysis by Maximum Likelihood. *Molecular Biology and*  
886 *Evolution* 24: 1586–1591.
- 887 Ziegler A, Kentenich H, & Uchanska-Ziegler B. 2005. Female choice and the MHC. *Trends in*  
888 *Immunology* 26: 496-502.
- 889 Zomer S, Dixon SJ, Xu Y, Jensen SP, Wang H, Lanyon CV, O'Donnell AG, Clare AS, Gosling  
890 LM, Penn DJ, & Brereton RG. 2009. Consensus multivariate methods in gas  
891 chromatography mass spectrometry and denaturing gradient gel electrophoresis: MHC-  
892 congenic and other strains of mice can be classified according to the profiles of volatiles and  
893 microflora in their scent-marks. *Analyst* 134: 114-123.
- 894 Zuur AF, Ieno EN, Walker NJ, Saveliev AA, & Smith GM. 2009. *Mixed Effects Models and*  
895 *Extensions in Ecology with R*. New York, New York. Springer.
- 896



897 **Figure 1.** Seasonal relationships between chemical diversity in genital secretions and MHC  
898 supertype diversity in male ring-tailed lemurs. Overall chemical diversity increased with  
899 increasing MHC supertype diversity across the breeding season (A), shown in black circles, and  
900 the nonbreeding season (B), shown in white circles.

901  
902 **Figure 2.** Seasonal relationships between various measures of chemical diversity in genital  
903 secretions and MHC supertype diversity in female ring-tailed lemurs. Overall chemical diversity  
904 was not correlated with MHC supertype diversity in either the breeding season (A), shown in  
905 black circles, or nonbreeding season (B), shown in white circles. Diversity indices for fatty acids  
906 (FAs) and fatty acid esters (FAEs) were not correlated with MHC supertype diversity in the  
907 breeding season (C and E, respectively), but were negatively correlated in the nonbreeding  
908 season (D and F, respectively).

909  
910 **Figure 3.** Relationships between genetic distance (number of unique MHC supertypes, i.e.,  
911  $MHC_{\text{supertype diff}}$ ) and chemical distance (relative Euclidean) between male-male (A-D) and  
912 female-female (E-H) ring-tailed lemur dyads during the breeding (closed circles; A-B and E-F)  
913 and nonbreeding seasons (open circles; C-D and G-H). The numbers of dyads are provided in  
914 the bottom panel.

915  
916 **Figure 4.** Relationships between the number of unique MHC supertypes (i.e.,  $MHC_{\text{supertype diff}}$ )  
917 and chemical distance (relative Euclidean) between male-female, ring-tailed lemur dyads during  
918 the breeding season (A-B), shown in black circles, and nonbreeding season (C-D), shown in  
919 white circles. The numbers of dyads are provided in the bottom panel.

920

921 **Figure 5.** Response of male ring-tailed lemurs to the odorants of female conspecifics: As the  
922 number of MHC-DRB supertypes between the male recipient and the female donor increases,  
923 the duration of male sniffing (A) and the frequency of shoulder rubbing (B) decreases  
924 significantly. As the diversity of the MHC genotype of the female donor increases, the duration  
925 of licking (C) decreases. Points are jittered to avoid overlap of data.

926

927 **Figure 6.** Response of female ring-tailed lemurs to the odorants of male conspecifics: As the  
928 number of amino acid differences between female recipient and male odorant donor increases,  
929 the duration of time the female sniffs the male's odor increases.

930

931 **Table 1.** Explanatory variables used in the analysis of recipient responses to conspecific  
 932 odorants and the model under which they were tested.

| Variable                      | Model      | Definition                                                                                                      |
|-------------------------------|------------|-----------------------------------------------------------------------------------------------------------------|
| MHC <sub>supertype diff</sub> | Good Fit   | The number of MHC-DRB supertypes that are different between a recipient-donor dyad                              |
| MHC <sub>allele diff</sub>    | Good Fit   | The number of MHC-DRB alleles that are different between a recipient-donor dyad                                 |
| MHC <sub>min</sub>            | Good Fit   | The minimum number of amino acid differences between a recipient-donor dyad's most similar MHC-DRB allele       |
| MHC <sub>mean</sub>           | Good Fit   | The mean number of pairwise amino acid differences between a recipient-donor dyad                               |
| MHC <sub>aa diff</sub>        | Good Fit   | The total number of amino acid differences between all possible pairs of alleles between a recipient-donor dyad |
| MHC <sub>donor</sub>          | Good Genes | The number of MHC-DRB alleles present in the donor                                                              |

933

934

935 **Table 2.** Relationships between measures of chemical diversity and of MHC diversity in male  
 936 ring-tailed lemurs across seasons, with significant relationships indicated in bold.

| Measure of chemical diversity | Best-fit explanatory variable     | Z value | P value      | Effect                                                                                                                                     |
|-------------------------------|-----------------------------------|---------|--------------|--------------------------------------------------------------------------------------------------------------------------------------------|
| Richness-<br>overall          | Season                            | 2.37    | <b>0.018</b> | Chemical richness decreases from nonbreeding season to breeding season, but increases with increasing MHC diversity.                       |
|                               | MHC <sub>supertype</sub>          | 2.31    | <b>0.021</b> |                                                                                                                                            |
|                               | Season * MHC <sub>supertype</sub> | -0.71   | 0.475        |                                                                                                                                            |
| Shannon<br>Index-<br>overall  | Season                            | 2.43    | <b>0.015</b> | Shannon diversity decreases from nonbreeding season to breeding season, but increases with increasing MHC diversity.                       |
|                               | MHC <sub>supertype</sub>          | 2.52    | <b>0.012</b> |                                                                                                                                            |
|                               | Season * MHC <sub>supertype</sub> | -1.45   | 0.146        |                                                                                                                                            |
| Simpson<br>Index-<br>overall  | Season                            | 1.64    | 0.10         | Simpson diversity does not change from breeding to nonbreeding season; however, Simpson diversity increases with increasing MHC diversity. |
|                               | MHC <sub>supertype</sub>          | 2.17    | <b>0.03</b>  |                                                                                                                                            |
|                               | Season * MHC <sub>supertype</sub> | -0.89   | 0.37         |                                                                                                                                            |

937

938

939 **Table 3.** Relationships between measures of chemical diversity and MHC diversity in female  
 940 ring-tailed lemurs across seasons, with significant relationships indicated in bold.

| Measure of chemical diversity | Best-fit explanatory variable     | Z value | P value      | Effect                                                                                                       |
|-------------------------------|-----------------------------------|---------|--------------|--------------------------------------------------------------------------------------------------------------|
| Richness-<br>overall          | Season                            | -0.53   | <i>0.600</i> | No relationship between female richness and season or MHC diversity.                                         |
|                               | MHC <sub>supertype</sub>          | -1.02   | <i>0.310</i> |                                                                                                              |
|                               | Season * MHC <sub>supertype</sub> | -0.92   | <i>0.360</i> |                                                                                                              |
| Shannon<br>Index-<br>overall  | Season                            | 0.77    | <i>0.442</i> | Overall Shannon index possibly negatively correlated with MHC diversity, but only in the nonbreeding season. |
|                               | MHC <sub>supertype</sub>          | -0.34   | <i>0.733</i> |                                                                                                              |
|                               | Season * MHC <sub>supertype</sub> | -1.69   | <i>0.091</i> |                                                                                                              |
| Simpson<br>Index-<br>overall  | Season                            | 0.86    | <i>0.390</i> | No relationship between female Simpson index and season or MHC diversity.                                    |
|                               | MHC <sub>supertype</sub>          | 0.24    | <i>0.810</i> |                                                                                                              |
|                               | Season * MHC <sub>supertype</sub> | -0.98   | <i>0.330</i> |                                                                                                              |
| Shannon<br>Index - FAs        | Season                            | 1.62    | <i>0.104</i> | FA Shannon index negatively correlated with MHC diversity, but only in the nonbreeding season.               |
|                               | MHC <sub>supertype</sub>          | -0.20   | <i>0.838</i> |                                                                                                              |
|                               | Season * MHC <sub>supertype</sub> | -3.09   | <b>0.002</b> |                                                                                                              |
| Shannon<br>Index -<br>FAEs    | Season                            | 1.43    | <i>0.152</i> | FAE Shannon index negatively correlated with MHC diversity, but only in the nonbreeding season.              |
|                               | MHC <sub>supertype</sub>          | -0.42   | <i>0.678</i> |                                                                                                              |
|                               | Season * MHC <sub>supertype</sub> | -2.63   | <b>0.009</b> |                                                                                                              |

941

942

943 **Table 4.** Partial Mantel tests for same-sex (MM and FF) dyads, showing seasonal relationships  
 944 between genital odor distance (relative Euclidean) and MHC-based genetic distance in ring-  
 945 tailed lemurs. Odor distance is based on 203 and 338 compounds for MM and FF dyads,  
 946 respectively. Tests include three socio-demographic and environmental variables as covariates.  
 947 Significant ( $P \leq 0.05$ ) sums of squares (SS), partial Mantel correlation coefficient ( $r$ ), and  $P$   
 948 values are shown in bold type, and trending ( $P \leq 0.10$ ) values are shown in italics.

| Dyad type | Variable            | Number of unique MHC supertypes |              |                  |                    |              |                  |
|-----------|---------------------|---------------------------------|--------------|------------------|--------------------|--------------|------------------|
|           |                     | Breeding season                 |              |                  | Nonbreeding season |              |                  |
|           |                     | SS                              | $r$          | $P$              | SS                 | $r$          | $P$              |
| MM dyads  | MHC                 | <b>2.309</b>                    | <b>0.408</b> | <b>&lt;0.001</b> | 0.042              | -0.079       | 0.276            |
|           | Age                 | 0.203                           | 0.121        | 0.068            | <b>0.139</b>       | <b>0.145</b> | <b>0.005</b>     |
|           | Housing             | 0.157                           | 0.106        | 0.101            | 0.006              | -0.029       | 0.692            |
|           | Month of collection | 0.006                           | -0.020       | 0.763            | <i>0.124</i>       | <i>0.137</i> | <i>0.062</i>     |
| FF dyads  | MHC                 | <b>0.391</b>                    | <b>0.313</b> | <b>&lt;0.001</b> | 0.003              | 0.027        | 0.738            |
|           | Age                 | 0.001                           | 0.014        | 0.872            | 0.008              | -0.047       | 0.560            |
|           | Housing             | 0.029                           | 0.085        | 0.323            | 0.004              | 0.034        | 0.679            |
|           | Month of collection | <i>0.093</i>                    | <i>0.153</i> | <i>0.076</i>     | <b>1.461</b>       | <b>0.623</b> | <b>&lt;0.001</b> |

949

950

951 **Table 5.** Relationship between the MHC-DRB genotype of female odorant donors and male  
 952 recipient behavior, directed toward the female’s scent mark, with significant relationships  
 953 indicated in bold. Explanatory variables with superscripts indicate the quadratic variable, while  
 954 those without superscripts are linear.

| Behavior     | Best-fit explanatory variable              | Z value | P value          | Effect                                                              |
|--------------|--------------------------------------------|---------|------------------|---------------------------------------------------------------------|
| Sniff mark   | MHC <sub>supertype diff</sub> <sup>2</sup> | -2.10   | <b>0.036</b>     | Shorter duration with increasing supertype differences between dyad |
| Sniff pole   | MHC <sub>supertype diff</sub> <sup>2</sup> | -2.54   | <b>0.011</b>     | Shorter duration with increasing supertype differences between dyad |
| Lick mark    | MHC <sub>donor</sub>                       | -4.45   | <b>&lt;0.001</b> | Shorter duration with increasing female donor MHC diversity         |
|              | MHC <sub>donor</sub> <sup>2</sup>          | 4.14    | <b>&lt;0.001</b> |                                                                     |
| Shoulder rub | MHC <sub>supertype diff</sub> <sup>2</sup> | -2.09   | <b>0.037</b>     | Fewer rubs with increasing supertype differences                    |

955

956

957 **Figure 1.**

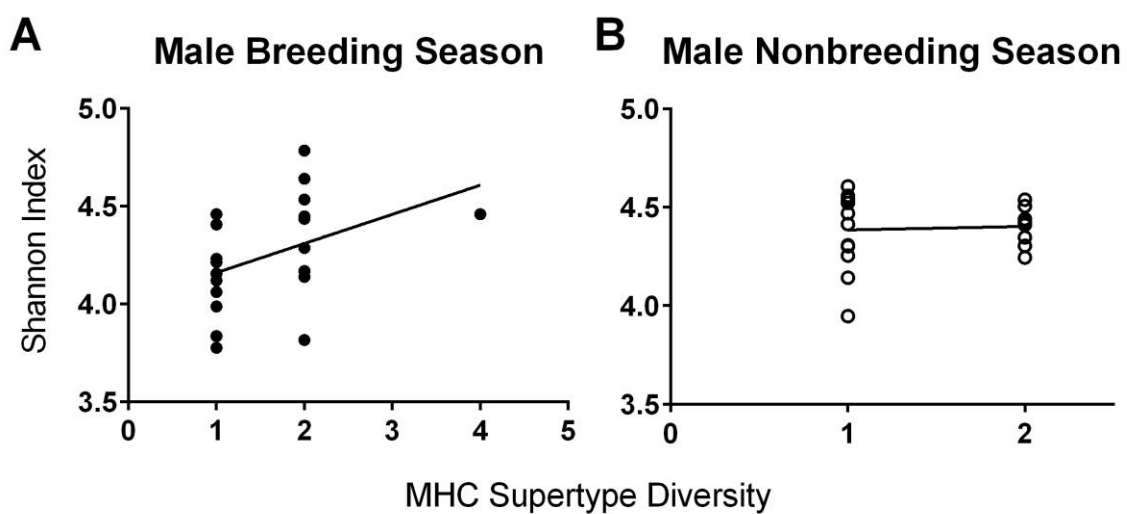

958

959

960 **Figure 2.**

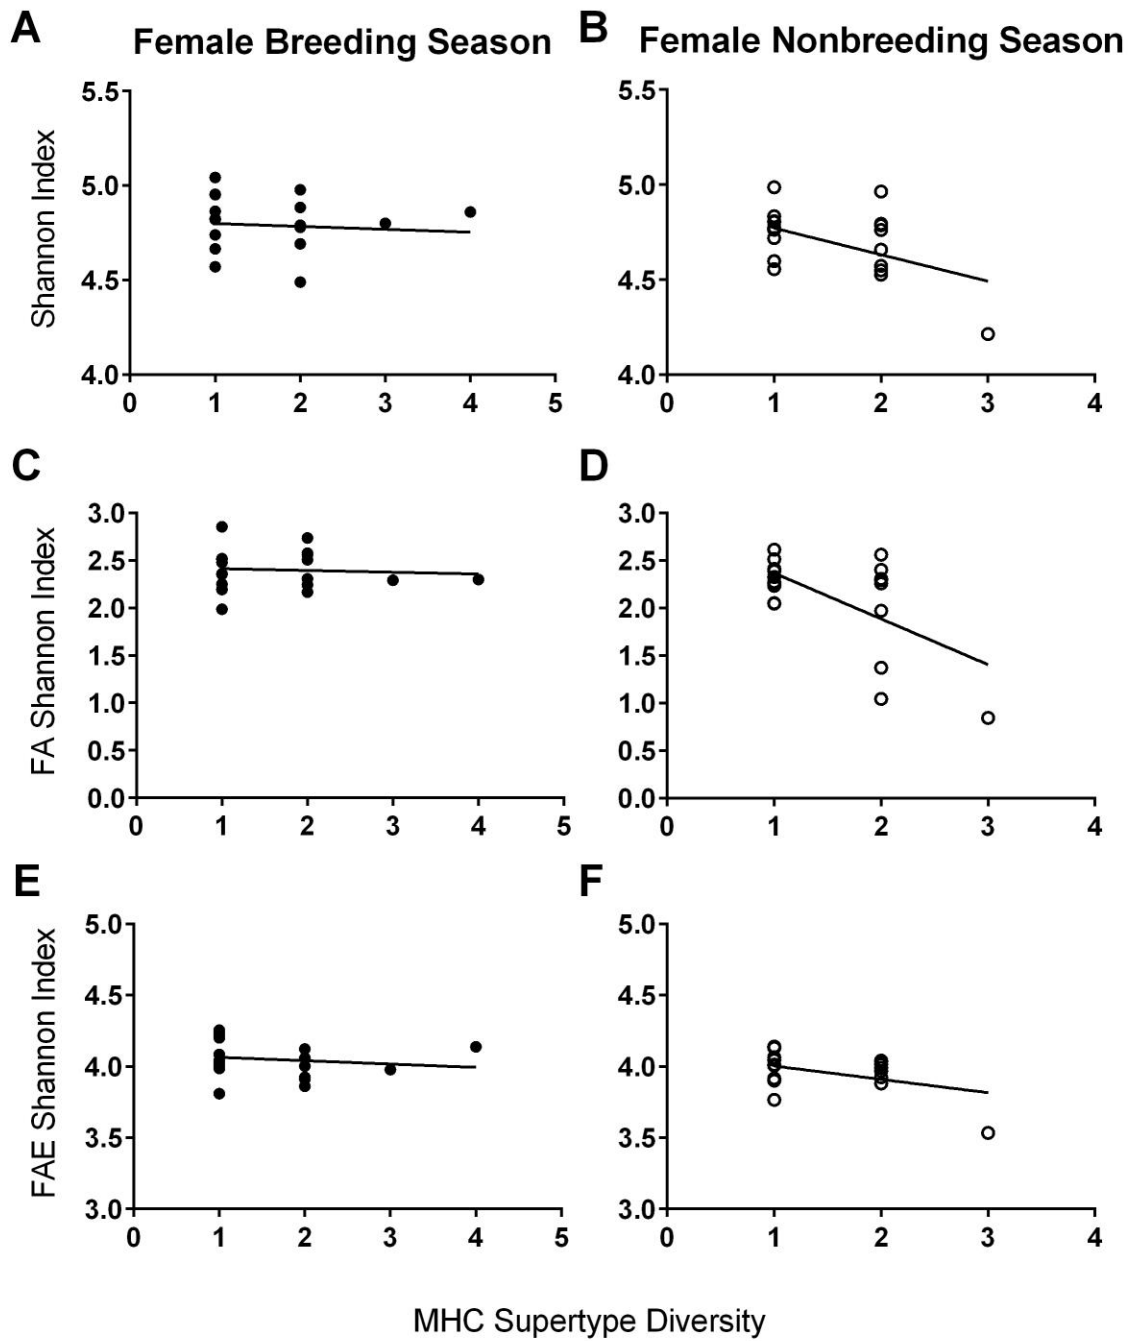

961

962



963 **Figure 3.**

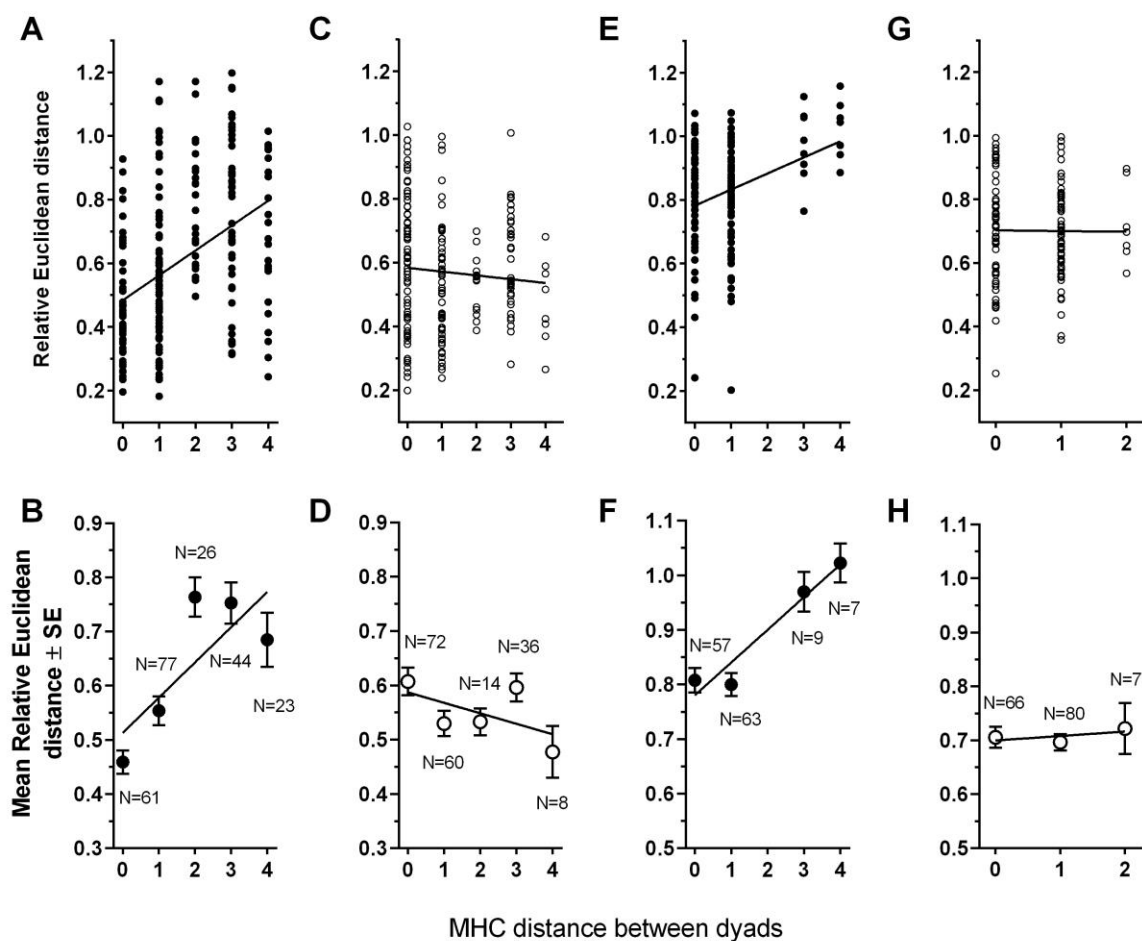

964

965

966 **Figure 4.**

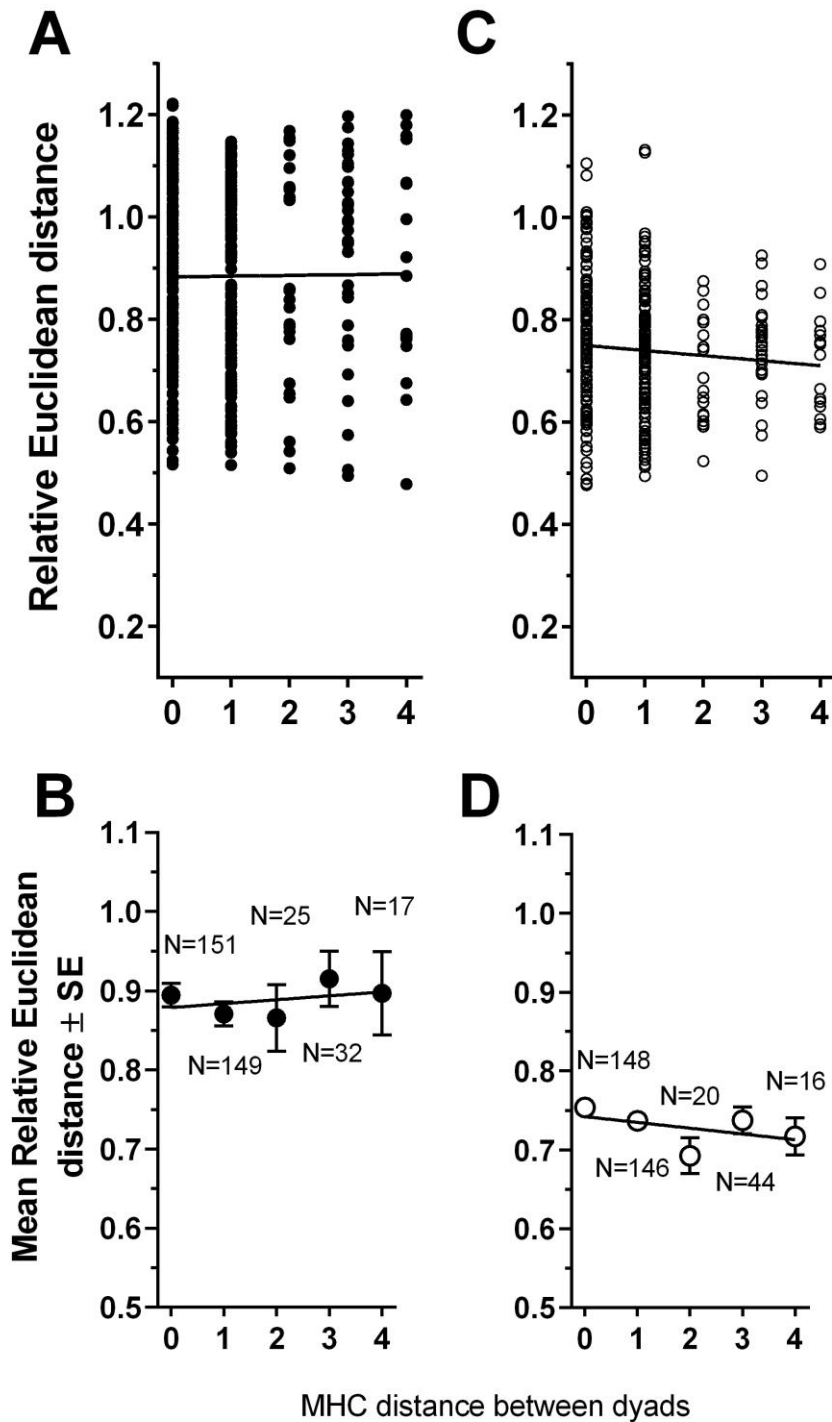

967

968

969 **Figure 5.**

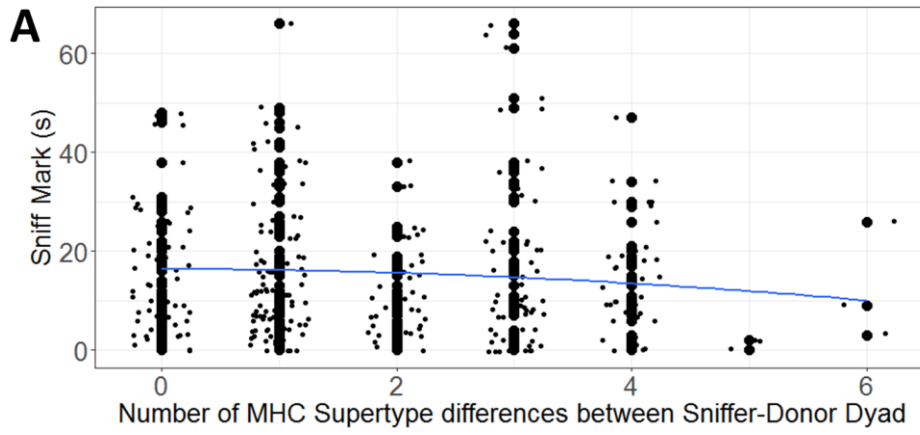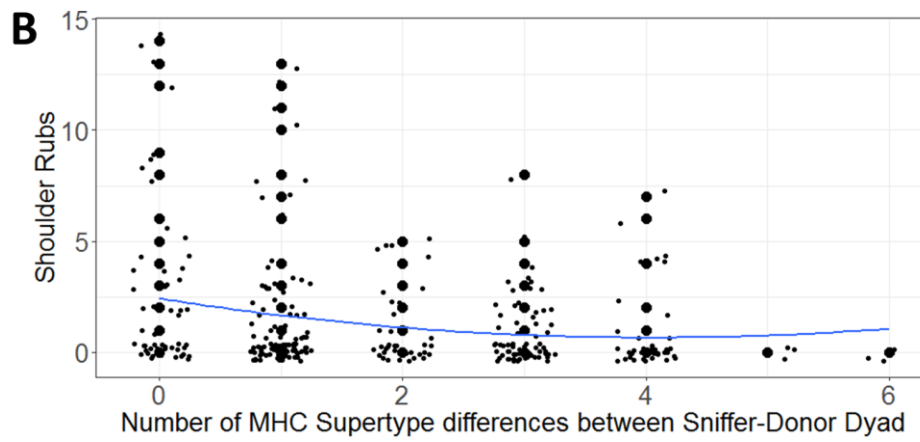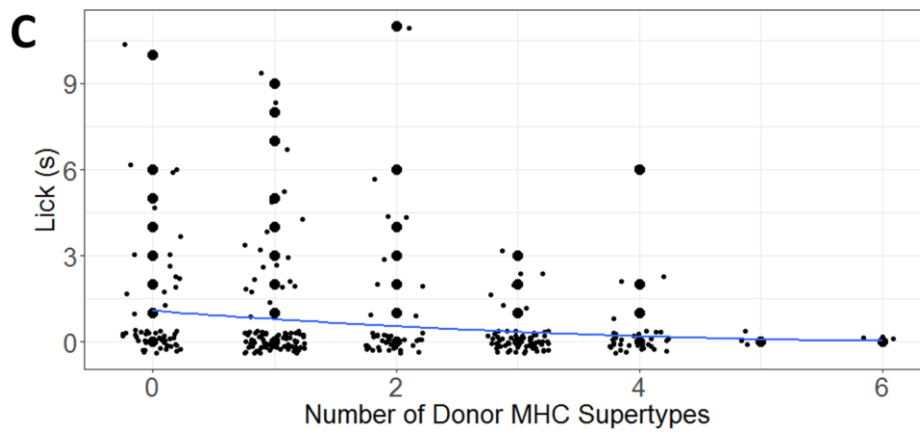

974 **Figure 6.**

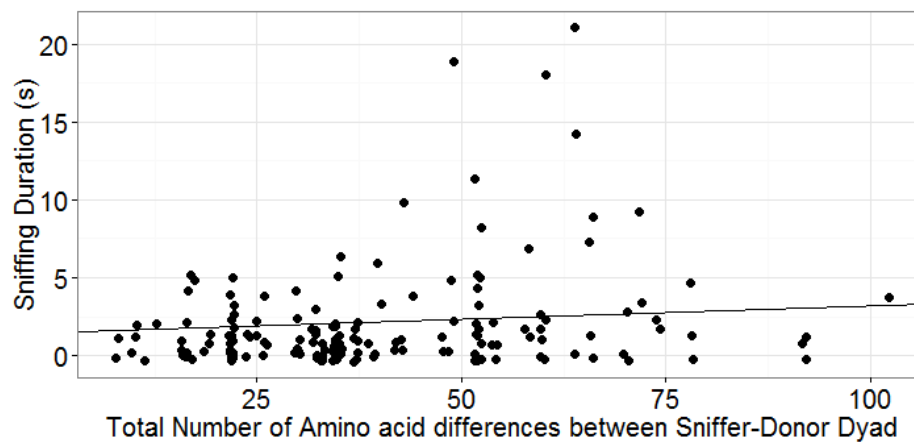

975

976
